# Supplementary material for: Similar North Pacific variability despite suppressed El Niño variability in the warm mid-Pliocene climate
Source: Copernicus journal article supplement (doi:10.5194/egusphere-2024-766), 2024-03-22
Supplement: Supplementary file [file egusphere-2024-766-RC1-supplement.pdf]

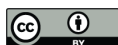

# Similar North Pacific variability despite suppressed El Niño variability in the warm mid-Pliocene climate

Arthur Merlijn Oldeman<sup>1</sup>, Michiel L.J. Baatsen<sup>1</sup>, Anna S. von der Heydt<sup>1,2</sup>, Frank M. Selten<sup>3</sup>, and Henk A. Dijkstra<sup>1,2</sup>

<sup>1</sup>Institute for Marine and Atmospheric research Utrecht (IMAU), Department of Physics, Utrecht University, 3584 CC Utrecht, the Netherlands

<sup>2</sup>Centre for Complex Systems Studies, Utrecht University, 3584 CE Utrecht, the Netherlands

<sup>3</sup>Royal Netherlands Meteorological Institute (KNMI), 3730 AE De Bilt, The Netherlands

**Correspondence:** Arthur Merlijn Oldeman (a.m.oldeman@uu.nl)

**Abstract.** The mid-Pliocene is the most recent geological period with similar atmospheric CO<sub>2</sub> concentration to the present-day, and similar surface temperatures as projected at the end of this century for a moderate warming scenario. While not a perfect analogue, the mid-Pliocene can be used to study the functioning of the Earth system under similar forcings as a near future, especially regarding features in the climate system for which uncertainties exist in future projections. According to the mid-Pliocene modelling ensemble PlioMIP2, the variability of El Niño-Southern Oscillation (ENSO) was suppressed. In this study, we investigate how teleconnections of ENSO, specifically variability in the North Pacific atmosphere, responds to a suppressed ENSO, according to the PlioMIP2. The multi-model mean shows a similar sea-level pressure (SLP) variability in the Aleutian Low (AL) in the mid-Pliocene and pre-industrial, but a per-model view reveals that the change in AL variability is related to the change in ENSO variability. Even though ENSO is suppressed, the teleconnection between ENSO sea-surface temperature anomalies, tropical precipitation and North Pacific SLP anomalies is quite robust in the mid-Pliocene. We split AL variability in a part that is ENSO-related, and a residual variability which is related to internal stochastic variability, and find that the change in ENSO-related AL variability is strongly related to the change in ENSO variability itself, while the change in residual AL variability is unrelated to ENSO change. Since the internal atmospheric variability, which is the dominant forcing of the AL variability, is largely unchanged, we are able to understand that the AL variability is largely similar even though ENSO variability is suppressed. We find that the specific change in ENSO and AL variability depends on both the model equilibrium climate sensitivity and Earth system sensitivity. Finally, we present a perspective of (extra-)tropical Pacific variability in the PlioMIP2, combining our results with literature findings on changes in the tropical mean climate as well as the Pacific Decadal Oscillation (PDO).

## 1 Introduction

The mid-Pliocene (~ 3Ma) is the most recent geological period that had a similar atmospheric CO<sub>2</sub> concentration to the present day (~ 400 ppm, de la Vega et al. (2020)). Its global surface temperatures were similar to those projected for the end of this century following the SSP2-4.5 future climate scenario (Tierney et al., 2020). Apart from elevated atmospheric CO<sub>2</sub>,

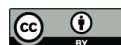

the mid-Pliocene had a similar geography - compared to earlier geological warm periods - to the present-day (Haywood et al., 2011). Notable differences include a reduction of the Greenland and West Antarctic ice sheets, closure of the Bering Strait and Canadian Arctic Archipelago, and changes to topography, bathymetry and vegetation (Dowsett et al., 2016). Because of these similarities, the mid-Pliocene climate has been called the 'best analogue' to near-future climate in comparison to other past warm periods (Burke et al., 2018). Regardless of its potential as future climate analogue, the mid-Pliocene can serve as a benchmark for climate models. The analysis of the climate system under mid-Pliocene boundary conditions can help us investigate the strength of feedbacks and the response of large-scale climate features to specific forcings.

The first coordinated effort to simulate the mid-Pliocene climate was the first phase of the Pliocene Model Intercomparison Project (PlioMIP, Haywood et al., 2010). It was followed by the PlioMIP2 (Haywood et al., 2016), and the most recent phase PlioMIP3 has just been announced (Haywood et al., 2024). PlioMIP2 was specifically designed to reduce model-proxy uncertainties. All models are supplied with consistent boundary conditions, which are focused on a specific time-slice (KM5c interglacial, 3.205Ma) where the orbital configuration was close to present-day conditions (Haywood et al., 2016; Dowsett et al., 2016).

In the past years, many studies of the mid-Pliocene climate based on the PlioMIP2 have been published. In the global mean, the mid-Pliocene climate was 3.3°C warmer than the pre-industrial climate (ranging between +1.7°C and +5.2°C) (Haywood et al., 2020). Increased CO<sub>2</sub> and closed gateways influenced the Arctic such that Arctic temperatures were relatively high due to Arctic amplification (De Nooijer et al., 2020). Most models simulate summer Arctic sea-ice free conditions and the Atlantic Meridional Overturning Circulation (AMOC) was intensified (De Nooijer et al., 2020; Weiffenbach et al., 2023). Atmospheric moisture content was increased, leading to more precipitation on average (Haywood et al., 2020), and specifically wetter conditions over the deep tropics (e.g. the Pacific Intertropical convergence zone, ITCZ) but drier conditions over the subtropics (Han et al., 2021). A hemispheric energy asymmetry shifts the Hadley circulation and ITCZ northwards (Han et al., 2021; Zhang et al., 2024). The Pacific Walker circulation is shifted westward (Han et al., 2021; Zhang et al., 2024), which is associated with warmer and wetter conditions over the Indian Ocean and Maritime Continent (Ren et al., 2023).

A more puzzling feature of the mid-Pliocene climate is the behaviour of the El Niño - Southern Oscillation (ENSO). In the present-day, ENSO is the dominant mode of climate variability on interannual timescales, with teleconnections to many regions of the world (Philander, 1990). Earlier work using proxy reconstructions showed a reduced zonal sea-surface temperature (SST) gradient in the tropical Pacific mean climate (Wara et al., 2005; Ravelo et al., 2006), on the basis of which it was suggested that the mid-Pliocene ENSO was settled in a 'permanent El Niño' state (Fedorov et al., 2006). Proxies for variability in the mid-Pliocene do suggest, however, that there existed ENSO variability with an amplitude varying between reduced and similar to the present-day (Scropton et al., 2011; Watanabe et al., 2011; White and Ravelo, 2020). Modelling efforts in PlioMIP1 (Brierley, 2015) as well as in PlioMIP2 (Oldeman et al., 2021) agree with that finding, showing that ENSO variability was reduced in the majority of the models, but with considerable spread in the model ensemble. The suppression of ENSO in the PlioMIP2 is explained by a series of off-equatorial processes triggered by the northward displacement of the Pacific ITCZ (Pontes et al., 2022).

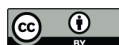

ENSO variability exerts a global influence through its oceanic and atmospheric teleconnections, which include a circum-global connection along the tropics and links with the stratosphere (Yeh et al., 2018; Cai et al., 2019; Domeisen et al., 2019). The so-called ‘atmospheric bridge’ explains the deterministic link between ENSO and variability of the North Pacific atmosphere and ocean, in which SST anomalies originating from ENSO events cause extratropical atmospheric variability via tropical convection, the Hadley circulation and atmospheric Rossby waves (Hoskins and Karoly, 1981; Mo and Livezey, 1986; Alexander et al., 2002). The variability in the North Pacific atmosphere is often referred to as Aleutian Low (AL) variability, which consists of the dominant Pacific-North American pattern (PNA) and the second-leading North Pacific Oscillation (NPO) (Barnston and Livezey, 1987; Linkin and Nigam, 2008). AL variability is in part forced by ENSO through the deterministic atmospheric bridge, but also by internal stochastic variability (Di Lorenzo et al., 2013; Newman et al., 2016). The dominant mode of ocean variability in the North Pacific is the Pacific Decadal Oscillation (PDO) which is forced by AL variability through wind forcing, as well as by ENSO through ocean waves (Newman et al., 2003; Di Lorenzo and Mantua, 2016; Newman et al., 2016).

What may happen to ENSO and its teleconnections to the North Pacific in the future under global warming is unclear. It is likely that ENSO precipitation variability will increase (Cai et al., 2021; Yun et al., 2021), and that variability of ENSO and atmospheric teleconnections including AL variability will increase in the near-future (Chen et al., 2018; Fredriksen et al., 2020; Cai et al., 2021). However, uncertainties are very large, in part due to internal variability (Fredriksen et al., 2020; Beobide-Arsuaga et al., 2021). Additionally, ENSO teleconnections can also change because mean atmospheric circulation will change, regardless of ENSO change (Yeh et al., 2018). However, equilibrated simulations under high CO<sub>2</sub> forcing suggest a weakening of ENSO variability (Callahan et al., 2021; Zheng et al., 2022). This makes the mid-Pliocene climate an **interesting** test case to investigate the response of North Pacific variability to a suppressed ENSO.

Although ENSO variability is reduced compared to the pre-industrial in the majority of the PlioMIP2 models (Oldeman et al., 2021), the amplitude of the PDO variability does not change, at least in a subset of the PlioMIP2 ensemble, making the PDO the dominant mode of ocean variability in the Pacific sector (Canal-Solis et al., 2024). However, there is a considerable model spread regarding both ENSO and PDO change in the PlioMIP2. In one PlioMIP2 model, it is the mid-Pliocene boundary conditions that cause an ENSO suppression and substantial suppression of the AL variability (specifically the PNA), while elevated CO<sub>2</sub> causes increased AL variability without any change of ENSO (Oldeman et al., 2023). It could indicate a tug-of-war in ENSO teleconnection responses to different conditions of the mid-Pliocene. However, the model used in Oldeman et al. (2023) showed the largest ENSO reduction of the PlioMIP2, so might not be representative for the rest of the ensemble.

In this study, we aim to answer the following question: How does variability in the North Pacific atmosphere respond to a suppressed ENSO in the warm mid-Pliocene climate, according to the PlioMIP2 ensemble? Specifically, we want to know: 1. Is any change in AL variability related to the change in ENSO? 2. Does the ENSO - North Pacific atmosphere teleconnection strength change? 3. Are there any changes in the North Pacific variability not related to ENSO change? And 4. Is the ENSO teleconnection response related to model climate sensitivity? To answer these questions, we will investigate simulation results of the PlioMIP2 ensemble. More details on the simulations and the analysis methods are presented in Section 2. Section 3



presents the results and provides answers to the research questions. In Section 4, we discuss the results and interpret our findings. We conclude with a summary in Section 5.

## 2 Methods

### 2.1 Models, simulations and data

#### 95 2.1.1 The PlioMIP2 ensemble

The PlioMIP2 ensemble consists of 17 climate models (Table 1). All models performed simulations following the PlioMIP2 protocol, which includes a pre-industrial control reference simulation (E280) and a mid-Pliocene simulation (Eoi400) (Haywood et al., 2016). Pre-industrial simulations are forced with 280ppm atmospheric CO<sub>2</sub>, while the mid-Pliocene simulations are forced with 400ppm CO<sub>2</sub>. Altered mid-Pliocene boundary conditions include closed Arctic gateways (Bering Strait and Canadian Arctic Archipelago), reduced land ice cover (Greenland ice sheet and West Antarctic ice sheet), shoaling of the Sunda and Sahul shelf leading to changes to straits in the Maritime Continent, and changes to vegetation, lakes and soils (Dowsett et al., 2016; Haywood et al., 2016). Only HadGEM3 has used a modern land-sea mask in the Eoi400 simulation (Williams et al., 2021). All model simulations have been run for a sufficient amount of model years to be considered in climatological equilibrium. We use the last 100 years from each simulation.

105 Additionally, we use two different sensitivity simulations that are available for a subset of PlioMIP2 models. We consider simulations with mid-Pliocene boundary conditions (BCs) but at pre-industrial CO<sub>2</sub> levels (Eoi280), ran by CCSM4-Utr, COSMOS and HadCM3. We also consider simulations with mid-Pliocene CO<sub>2</sub> levels but pre-industrial conditions otherwise (E400), ran by CCSM4-UoT, COSMOS and HadCM3.

#### 2.1.2 Observational data

110 We compare the pre-industrial results to observational products of the present-day and historical period. For SSTs, we use the NOAA Extended Reconstructed SSTs (ERSST) v5 (Huang et al., 2017). For atmospheric variables, we use the NOAA Twentieth Century Reanalysis project (20CR) v3 (Slivinski et al., 2021). We will refer to both data as *NOAA observations*. For consistency, we use 100 years, namely 1916 - 2015. These NOAA products have data available in the 19th century, which might be more like the pre-industrial, but the caveat is that the data gets less reliable, so we chose to use recent data with higher  
115 reliability and consistency instead.

### 2.2 Analysis methods

We use 100 years of monthly SST, sea-level pressure (SLP) and total precipitation fields. For anomalies, we remove the climatology and a linear trend. For NOAA observations, we perform a Lowess filtering instead (50 year running mean), to remove the trend from anthropogenic climate change. For model data, performing Lowess filtering instead of removing a



**Table 1.** Details of the models contributing to the PlioMIP2 ensemble, with Equilibrium Climate Sensitivity (ECS) and Earth System Sensitivity (ESS) from Haywood et al. (2020) and Williams et al. (2021). In **bold** the models primarily used in this study. \* when the model has sensitivity simulations available (either E400 or Eoi280).

| Model ID            | Sponsor(s), Country                                                     | Atmosphere resolution (°) | Ocean resolution (°)                     | ECS / ESS (°C) | Reference                  |
|---------------------|-------------------------------------------------------------------------|---------------------------|------------------------------------------|----------------|----------------------------|
| <b>CCSM4</b>        | National Centre for Atmospheric Research (NCAR), USA                    | $0.9 \times 1.25$         | $\sim 1.0 \times 1.0$                    | 3.2 / 5.1      | Feng et al. (2020)         |
| <b>CCSM4-UoT*</b>   | University of Toronto, Canada                                           | $0.9 \times 1.25$         | $\sim 1.0 \times 1.0$                    | 3.2 / 7.3      | Chandan and Peltier (2017) |
| <b>CCSM4-Utr*</b>   | Utrecht University, The Netherlands                                     | $1.9 \times 2.5$          | $\sim 1.0 \times 1.0$                    | 3.2 / 9.1      | Baatsen et al. (2022)      |
| <b>CESM1.2</b>      | NCAR, USA                                                               | $0.9 \times 1.25$         | $\sim 1.0 \times 1.0$                    | 4.1 / 7.7      | Feng et al. (2020)         |
| <b>CESM2</b>        | NCAR, USA                                                               | $0.9 \times 1.25$         | $\sim 1.0 \times 1.0$                    | 5.3 / 10.0     | Feng et al. (2020)         |
| <b>COSMOS*</b>      | Alfred Wegener Institute, Germany                                       | $3.75 \times 3.75$        | $3.0 \times 1.8$                         | 4.7 / 6.5      | Stepanek et al. (2020)     |
| <b>EC-Earth3-LR</b> | Stockholm University, Sweden                                            | $\sim 1.125 \times 1.125$ | $1.0 \times 1.0$                         | 4.3 / 9.4      | Zheng et al. (2019)        |
| <b>GISSE2.1G</b>    | Goddard Institute for Space Studies, USA                                | $2.0 \times 2.5$          | $1.0 \times 1.25$                        | 3.3 / 4.0      | -                          |
| <b>HadCM3*</b>      | University of Leeds, UK                                                 | $2.5 \times 3.75$         | $1.25 \times 1.25$                       | 3.5 / 5.6      | Hunter et al. (2019)       |
| <b>HadGEM3</b>      | University of Bristol, UK                                               | $1.875 \times 1.25$       | $\sim 1.0 \times 1.0$                    | 5.5 / 9.7      | Williams et al. (2021)     |
| <b>IPSL-CM5A</b>    | Laboratoire des Sciences du Climat et de l'Environnement (LSCE), France | $3.75 \times 1.875$       | $2.0 \times 2.0, 0.5$<br>in tropics      | 4.1 / 4.5      | Tan et al. (2020)          |
| <b>IPSL-CM5A2</b>   | LSCE, France                                                            | $3.75 \times 1.875$       | $2.0 \times 2.0, 0.5$<br>in tropics      | 3.6 / 4.2      | Tan et al. (2020)          |
| IPSL-CM6A           | LSCE, France                                                            | $2.5 \times 1.26$         | $\sim 1.0 \times 1.0,$<br>1/3 in tropics | 4.8 / 6.5      | Lurton et al. (2020)       |
| MIROC4m             | University of Tokyo, Japan                                              | $\sim 2.8 \times 2.8$     | $0.56-1.4 \times 1.4$                    | 3.9 / 4.7      | Chan and Abe-Ouchi (2020)  |
| MRI-CGCM2.3         | University of Tsukuba, Japan                                            | $\sim 2.8 \times 2.8$     | $0.5-2.0 \times 2.5$                     | 2.8 / 4.7      | Kamae et al. (2016)        |
| <b>NorESM-L</b>     | Bjerknes Centre for Climate Research (BCCR), Norway                     | $\sim 3.75 \times 3.75$   | $\sim 3.0 \times 3.0$                    | 3.1 / 4.1      | Li et al. (2020)           |
| <b>NorESM1-F</b>    | BCCR, Norway                                                            | $1.9 \times 2.5$          | $\sim 1.0 \times 1.0$                    | 2.3 / 3.3      | Li et al. (2020)           |

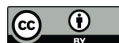

120 linear trend did not make any difference for the results. When computing ensemble means in space, we interpolate the model data on a rectilinear  $\sim 1^\circ$  grid.

We study variability through defined climate indices. We study ENSO variability through SST anomalies in the Niño3.4 region ( $5^\circ\text{S} - 5^\circ\text{N}$ ,  $150^\circ\text{W} - 90^\circ\text{W}$ ), which was shown to capture ENSO variability well also in the mid-Pliocene (Oldeman et al., 2021). To study Aleutian Low (AL) variability, we use SLP anomalies in the AL region ( $30^\circ\text{N} - 65^\circ\text{N}$ ,  $160^\circ\text{E} - 140^\circ\text{W}$ ), also known as the North Pacific index (Trenberth and Hurrell, 1994; Chen et al., 2020). This region also captures AL variability in the mid-Pliocene simulations as will be shown in the Results section. The PDO is studied through the dominant principal component (PC) of SST anomalies in the North Pacific ( $20^\circ\text{N} - 70^\circ\text{N}$ , Newman et al. (2003)). We study precipitation variability in the West Equatorial Pacific (WEP), which is the region that has the strongest ENSO-related precipitation anomalies (Deser and Wallace, 1990; Williams et al., 2024), here defined as  $6^\circ\text{S} - 6^\circ\text{N}$ ,  $120^\circ\text{E} - 180^\circ\text{E}$  following Oldeman et al. (2023). In all cases we take area averages using grid weights based on the cosine of the latitude. Amplitudes of variability are generally defined as the standard deviation (SD) of the associated time-series.

In order to connect ENSO teleconnections to other modes of variability, we compute the linear regression (linear slope) and correlation between the climate indices, where we quantify the teleconnection strength by means of the linear regression (e.g. Williams et al., 2024). Correlations are assumed statistically significant only if the corresponding p-value is below 0.05. Since the ENSO signal is strongest in boreal winter, we focus on the DJF mean Niño3.4 index. The present-day ENSO leads AL and PDO variability and we focus on the AL variability in DJFM and PDO variability in FMA. These months are chosen because the atmospheric response can take  $\sim 1$ -2 weeks, while the ocean response can take  $\sim 1$ -3 months (e.g. Trenberth and Hurrell, 1994; Alexander et al., 2002; Newman et al., 2016). We test whether this assumption is valid by computing the lead-lag correlations between ENSO and the AL and PDO time-series, and find that ENSO leads AL with a 0-1 month lag with strongest correlations around January Niño3.4, and ENSO (and AL) lead PDO with 2-3 months lag with strongest correlations around January Niño3.4, for NOAA observations and the majority of the models (Supplementary Material Figure S1).

The deterministic teleconnection linking ENSO and AL variability, the atmospheric bridge, consists of several steps. ENSO-SST anomalies leading to tropical convection anomalies (i.e. precipitation anomalies) are an important precursor to extratropical SLP anomalies in the North Pacific. Examining this step is relevant considering the substantial changes in Indo-Pacific mean hydrological cycle in the PliomIP2 (e.g. Han et al., 2021; Ren et al., 2023; Zhang et al., 2024). So, we also consider the regression between the Niño3.4 index and tropical precipitation, and the regression between WEP precipitation and North Pacific SLP anomalies.

Since we are interested in the ENSO - AL teleconnection change in the mid-Pliocene, we check whether the PliomIP2 models are able to simulate that connection well in the pre-industrial. We find that IPSL-CM6A, MIROC4m and MRI-CGCM2.3 do not show statistically significant correlations between the Niño3.4 and AL indices in the E280 simulation, in any relevant combination of months, or any subsection of the AL region. Hence, we do not use the results of IPSL-CM6A, MIROC4m and MRI-CGCM2.3 in this study. A more detailed justification of this omission is included in the Supplementary Material (text and Figures S1-S3).

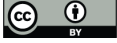

To separate the AL variability in a part that is related to ENSO, and a part that is not related to ENSO, we split the total AL  
 155 variability ( $A_{tot}$ ) by following a linear regression model (LRM; see, e.g. Chiang and Vimont, 2004; Deser et al., 2017):

$$A_{tot}(t) = A_N(t) + A_{res}(t) \quad (1)$$

in  $hPa$ , where the  $A_N$  represents the part of the AL variability that linearly regresses with the Niño3.4 index, and  $A_{res}$  any  
 residual variability:

$$A_N(t) = \beta_{N,A_{tot}} \cdot N(t) \quad (2)$$

160 where  $N$  is the Niño3.4 index in  $^{\circ}C$ , and  $\beta_{N,A_{tot}}$  the linear regression between the Niño3.4 index and the AL index in  $hPa/^{\circ}C$ .  
 We compute  $A_{tot}$  and  $A_N$ , and  $A_{res}$  then follows from the LRM. The LRM is constructed such that the time-variance of the  
 total AL variability is the sum of the variance of the Niño-regr. part and the variance of the residual:

$$\sigma_{A_{tot}}^2 = \sigma_{A_N}^2 + \sigma_{A_{res}}^2 \quad (3)$$

in  $hPa^2$ . The Niño-regr. part represents the part of the AL variability that covaries linearly with ENSO and can be seen as  
 165 the part of the variability that is explained or caused by ENSO variability. By definition, the Niño-regr. AL variability and the  
 residual AL variability are uncorrelated. The residual thus represents that part of the AL variability that is either non-linearly  
 related to ENSO, or not covarying with ENSO at all. This last part could be any internal stochastic variability (e.g. variability  
 related to the jet streams, sea-ice cover, Arctic Oscillation, etc.).

Regarding model climate sensitivities, we use both equilibrium climate sensitivity (ECS) as well as Earth system sensitivity  
 170 (ESS). ECS is defined as the global mean surface temperature response to a doubling of  $CO_2$  once the energy balance has  
 reached equilibrium. ESS is defined as the temperature response to a  $CO_2$  doubling and to other forcing changes, in other  
 words including responses to feedbacks with long timescales such as those involving ice sheets. ESS is relevant in the context  
 of (past) climates where there are more changes in forcings than elevated  $CO_2$ . We obtain the values for ECS and ESS from  
 Haywood et al. (2020) and Williams et al. (2021) which are included in Table 1.

175 Using the sensitivity simulations, we define a fraction of the total ENSO-AL response (FoR) in the mid-Pliocene which is  
 due to elevated  $CO_2$  as follows:

$$FoR_{CO_2} = d_{CO_2} / (d_{CO_2} + d_{BCs}) \quad (4)$$

where  $d_{CO_2}$  and  $d_{BCs}$  are the distances in terms of relative ENSO change and relative AL change due to elevated  $CO_2$  and due  
 to the mid-Pliocene BCs, respectively. Using sensitivity simulation E400 (elevated  $CO_2$  with pre-industrial BCs), we compute  
 180 the distances as follows:

$$d_{CO_2} = \sqrt{\left(\frac{\sigma_{N,E400} - \sigma_{N,E280}}{\sigma_{N,E280}}\right)^2 + \left(\frac{\sigma_{A,E400} - \sigma_{A,E280}}{\sigma_{A,E280}}\right)^2} \quad (5)$$

$$d_{BCs} = \sqrt{\left(\frac{\sigma_{N,Eoi400} - \sigma_{N,E400}}{\sigma_{N,E400}}\right)^2 + \left(\frac{\sigma_{A,Eoi400} - \sigma_{A,E400}}{\sigma_{A,E400}}\right)^2} \quad (6)$$

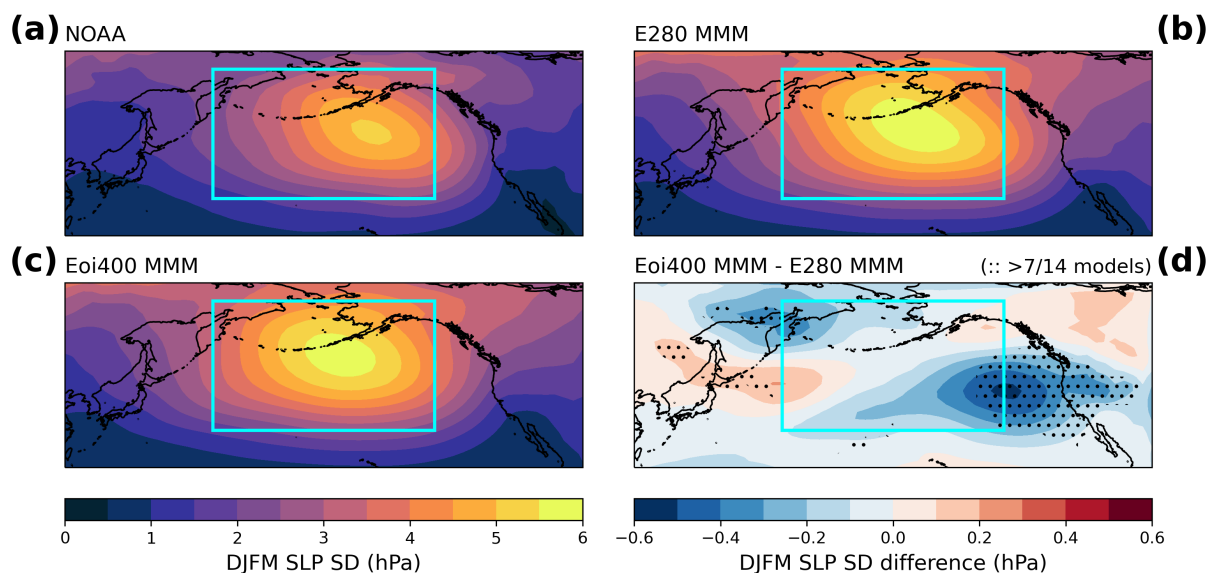

**Figure 1.** Standard deviation (SD) of the DJFM mean sea-level pressure (SLP) for (a) NOAA observations, (b) E280 multi-model mean (MMM), (c) Eoi400 MMM and (d) difference between Eoi400 MMM and E280 MMM. Cyan rectangle indicates Aleutian low region. Arcing in (d) when more than 7 out of 14 models agree with the sign of change.

where  $\sigma_{N,x}$  and  $\sigma_{A,x}$  are the amplitudes (standard deviation) of the Niño3.4 index and AL index in simulation ‘ $x$ ’, respectively. In the case of sensitivity simulation Eoi280, the  $d_{CO_2}$  and  $d_{BC_s}$  are determined using the differences between Eoi400 - Eoi280 and Eoi280 - E280, respectively. If the change in AL would be zero throughout all simulations, the distances simply reduce to the relative ENSO change, and the FoR becomes a fraction of the ENSO change between the set of simulations.

### 3 Results

#### 3.1 AL variability and ENSO change

Figure 1 shows the DJFM SLP SD for NOAA observations (a), the E280 multi model mean (MMM, b), the Eoi400 MMM (c) and difference between Eoi400 and E280 (d). The pre-industrial MMM reproduces the spatial pattern of the NOAA observations SLP SD well, but overestimates the amplitude substantially, which is a known model bias (Chen et al., 2018; Eyring et al., 2021). The mid-Pliocene MMM is not substantially different from the pre-industrial MMM, implying that in all cases almost all of the North Pacific atmospheric variability is captured in the AL region. The MMM mid-Pliocene minus pre-industrial differences are small, and furthermore, more than half of the models in the ensemble do not agree on the sign of change in the AL region. The largest and most consistent change across the ensemble is a reduction in SLP variability along the North American West coast. Even there, the maximum change corresponds to approximately -10%.





While the multi-model mean suggests no substantial change in AL variability, a per-model look reveals a variety of responses, which is related to the ENSO amplitude change. Figure 2 shows scatter plots of the ENSO amplitude (defined as Niño3.4 SD) and AL amplitude in the pre-industrial E280 (a), mid-Pliocene Eoi400 (b) and as difference between the simulations (c). The ENSO amplitude in the NOAA observations is well reproduced by the E280 ensemble, while the AL amplitude is overestimated by the majority of the models. The Eoi400 ensemble shows a large spread in both ENSO and AL amplitudes, compared to the E280. In the E280 and Eoi400, the AL amplitude does not correlate well with the ENSO amplitude (i.e. no statistically significant ensemble correlation,  $p\text{-value} > 0.05$ ). However, the change in AL amplitude in the ensemble is related to the change in ENSO amplitude with a statistically significant correlation coefficient of 0.76. Generally, models with slight ENSO change show a similar or increased AL variability in the mid-Pliocene, while the models with substantial ENSO reduction show a similar or reduced AL variability. There is a considerable model spread regarding this relation, though, implying that the change in AL variability is not just related to ENSO change.

### 3.2 ENSO teleconnection with the North Pacific atmosphere

Figure 3 shows the linear regression, representing the ENSO - AL teleconnection strength, for the E280 and Eoi400 (a) and the relative change between the two (b). Results per model are included in the Supplementary Material (Figure S3). The majority of the models overestimate the regression in the pre-industrial when compared to NOAA observations, which is expected since most models overestimate AL variability, while ENSO variability is similar to observations and correlations are similar too (Supplementary Material Figure S3). The large spread in modelled ENSO - AL teleconnection strength compared to observations is also reported in CMIP5 generation models (e.g. Deser et al., 2017). The MMM shows a similar regression in the pre-industrial and mid-Pliocene. The Eoi400 regression for CCSM4-Utr and EC-Earth3.3 are set to zero because the correlation between ENSO and AL becomes statistically insignificant in the mid-Pliocene simulation (i.e.  $p\text{-value} > 0.05$ ). Not doing this would not change the ensemble mean substantially because the correlations are weak nonetheless. Figure 2(b) shows that the ensemble mean (red dashed line) and median (red line in boxplot) values are slightly positive. However, the confidence intervals around the median (boxplot notches) encompass 0%, meaning that we cannot statistically speak of an increase in regression. An ensemble end-member is COSMOS, showing the largest increase in regression strength, whereas CCSM4-Utr and EC-Earth3.3 show the largest decrease. The change in regression is weakly but significantly correlated to the change in ENSO and the change in AL across the ensemble (Supplementary Material Figure S4).

Figure 4 shows the E280 ensemble mean regression between the Niño3.4 index and tropical Pacific precipitation (b) and the WEP precipitation index and SLP in the North Pacific (a). Regressions are only shown when a majority of the models have a statistically significant correlation (i.e.  $p\text{-value} < 0.05$ ) in that grid-cell. Pre-industrial ENSO variability leads to a strong precipitation signal in the WEP (b, box drawn), and precipitation anomalies in that region lead to a strong SLP signal in the AL region (a, box drawn). The shape and amplitude of the regression patterns look similar to NOAA observations (Supplementary Material Figure S5) and present-day simulations (Williams et al., 2024). Figure 4(c) shows the change in ENSO-WEP precipitation regression and change in WEP precipitation-AL regression. The ensemble mean indicates no change in both regressions. It agrees with the previous finding that the ENSO-AL regression does not change, and shows that this is not because of con-

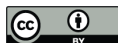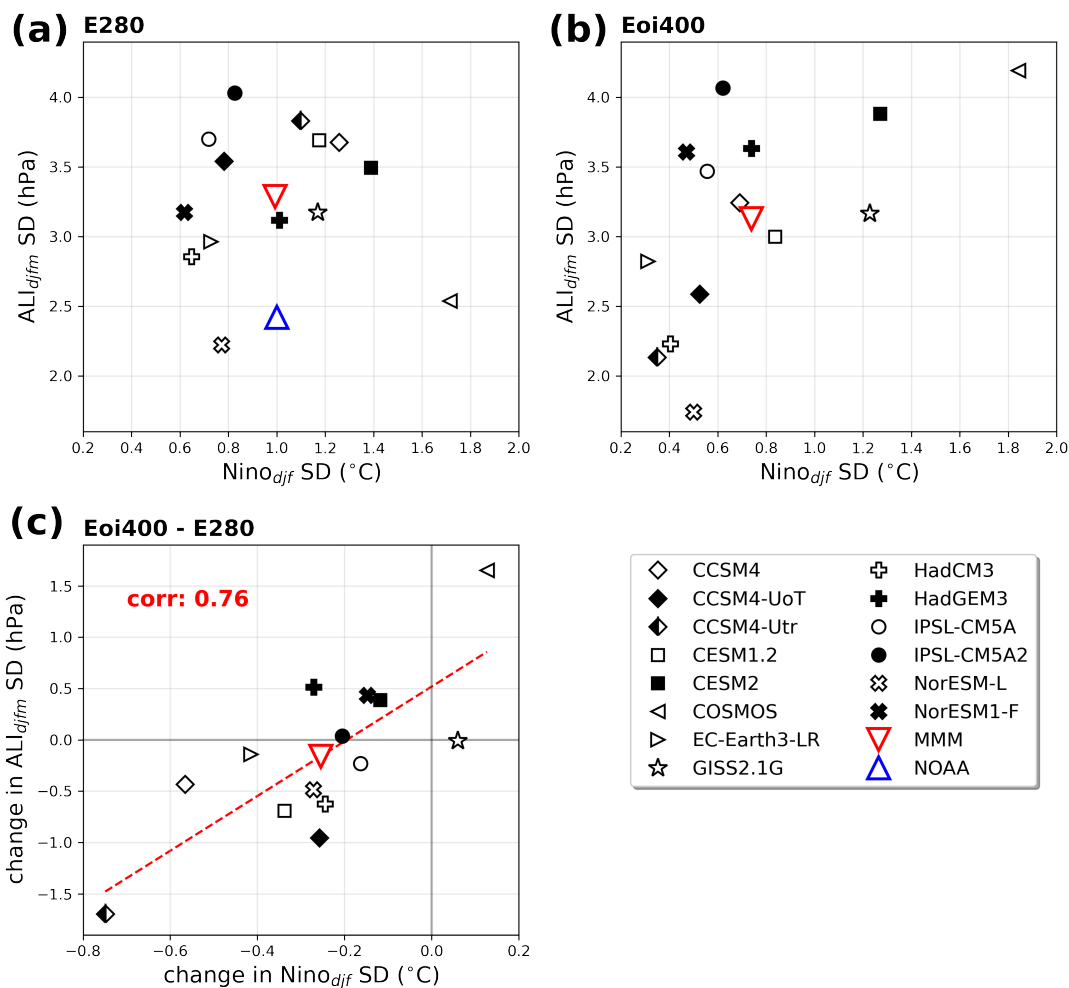

**Figure 2.** Scatter plots of DJF Niño SD versus DJFM AL SD in the E280 (a) and Eoi400 (b). Scatter of Eoi400 - E280 differences in Niño SD and AL SD (c). Red triangle is the multi-model mean (MMM), blue triangle the NOAA observations. Red dashed line in (c) is a linear fit through the points, with a significant correlation coefficient of 0.76.

cealed counteracting changes in the teleconnection processes. Figure 4(c) also shows that the strong increase in ENSO-AL regression in COSMOS is both due to the ENSO-WEP precipitation and WEP precipitation-AL regression strengthening. For CCSM4-Utr, the weaker regression is mainly due to the WEP precipitation-AL link weakening, while the weaker regression in EC-Earth3.3 is mainly related to a weakening of the ENSO-WEP precipitation link.

### 235 3.3 Separating ENSO and non-ENSO related AL variability

We split the AL variability in a part that regresses with ENSO (Niño-regr.) and a residual following the LRM as explained in Section 2. The variances of both parts add up to the total AL variance. Figure 5 shows the Niño-regressing AL variance,

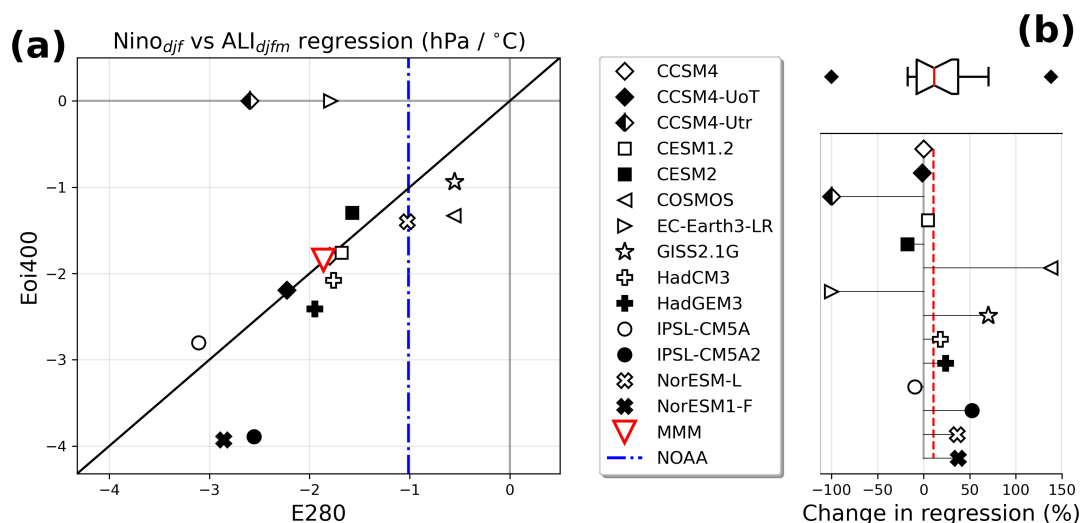

**Figure 3.** (a) Regression (linear slope) between DJF Niño and DJFM AL in the E280 and Eoi400, per model. Red triangle multi-model mean (MMM), blue dashed-dotted line NOAA observations. Eoi400 value of CCSM4-Utr and EC-Earth3-LR set to zero because there is no significant correlation between the two variables (i.e.  $p\text{-value} > 0.05$ ). (b) Relative change in this regression per model, red-dashed line indicating multi-model mean. Including boxplot (red line here is median).

the residual AL variance and total AL variance for all models and simulations. In the ensemble mean, the Niño-regr. AL variance decreases in the mid-Pliocene, which can be understood since the ENSO amplitude reduces (Figure 2c) while the ENSO-AL teleconnection strength does not change (Figure 3). The AL residual variance does not change in the ensemble mean. The pre-industrial ensemble mean overestimates both parts of the AL variance compared to NOAA observations. It also overestimates the AL variance fraction related to ENSO (0.30 over 0.18), which can be explained since the ensemble mean regression is overestimated (Figure 3a) whereas the ENSO amplitude is similar (Figure 2a). CMIP6 generation models have been shown to generally underestimate the tropical influence on variability in the North Pacific (Zhao et al., 2021), which in this case is true for 4/14 models. In the ensemble mean, the fraction of the AL variance related to ENSO decreases from 0.30 to 0.22 in the mid-Pliocene, and 10/14 models agree with that sign of change in variance fraction. For 9 models this is because the ENSO-AL variance decreases. For NorESM1-F the variance fraction decreases because the residual variance increases, while for NorESM-L the variance fraction increases despite a slight reduction of the ENSO-related variance, caused by a stronger reduction of the residual variance. The ENSO-related AL variance is zero for CCSM4-Utr and EC-Earth3.3 because the ENSO-AL regression is set to zero.

Figure 6 shows the change in the AL amplitude (in terms of SD), split in the part that regresses with ENSO (a) and the residual variability (b) as a function of the change in ENSO amplitude (similar to Figure 2c). By using the LRM to split the AL variability, we are able to separate the change in AL variability into a part regressing with ENSO where the change is strongly dependent on the change in ENSO variability (corr. coef. of 0.89 over 0.76 for the total AL change; Figure 2c), and a residual where the change is not related to ENSO change (corr. becomes insignificant). In the ensemble mean, there is a slight reduction

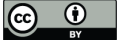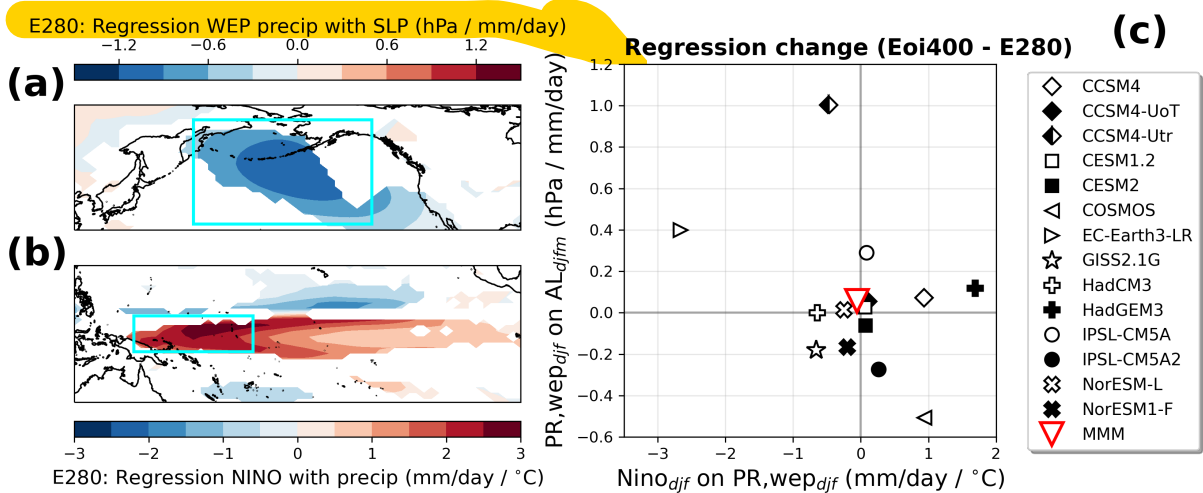

**Figure 4.** (a) E280 multi-model mean regression between DJF precipitation in the west-equatorial Pacific (WEP) and DJFM SLP in the North Pacific. Cyan rectangle indicates Aleutian low region. (b) E280 multi-model mean regression between DJF Niño3.4 and DJF precipitation. Cyan rectangle indicates WEP region. For both (a) and (b), values are only shown if more than 7 out of 14 models have a statistical significant correlation ( $p$ -value < 0.05). (c) Scatter plot of Eoi400 - E280 change of regression between Niño3.4 and WEP precipitation versus change of regression between WEP precipitation and AL. Red triangle is multi-model mean (MMM). Regressions in either E280 or Eoi400 have been set to 0 when correlations are not statistically significant (i.e.  $p$ -value > 0.05)

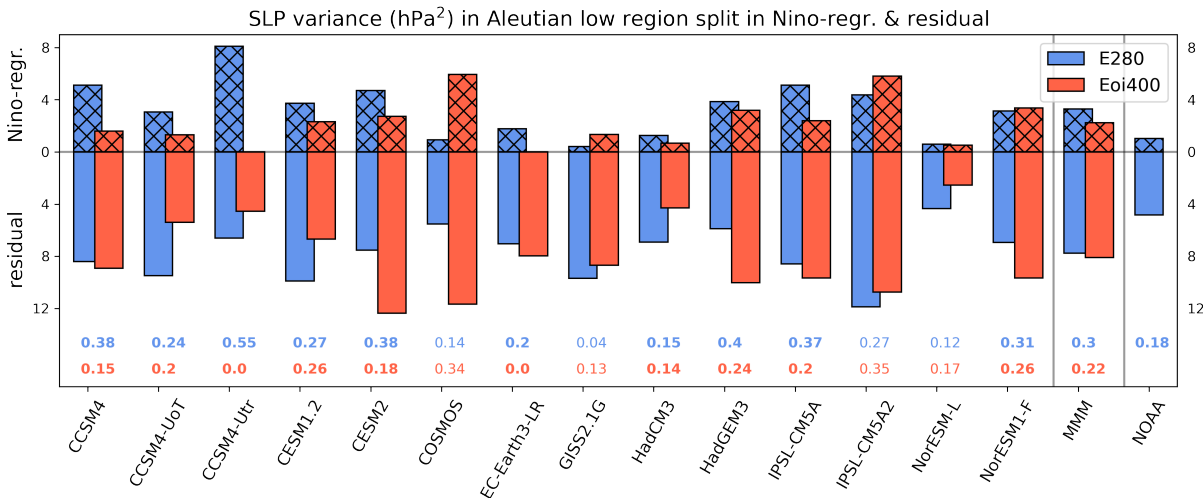

**Figure 5.** Aleutian low (AL) variance split (following a linear regression model, LRM) in AL variance that regresses with Niño (Niño-regr., hatched) and the residual AL variance. Per model for the E280 (blue) and Eoi400 (red), including multi-model mean (MMM) and result from NOAA observations. Full bar length represents total AL variance. Values below are the variance fraction of the Niño-regr. part, for E280 (blue, top) and Eoi400 (red, bottom), in **bold** when the variance fraction is lower in the Eoi400 compared to the E280.

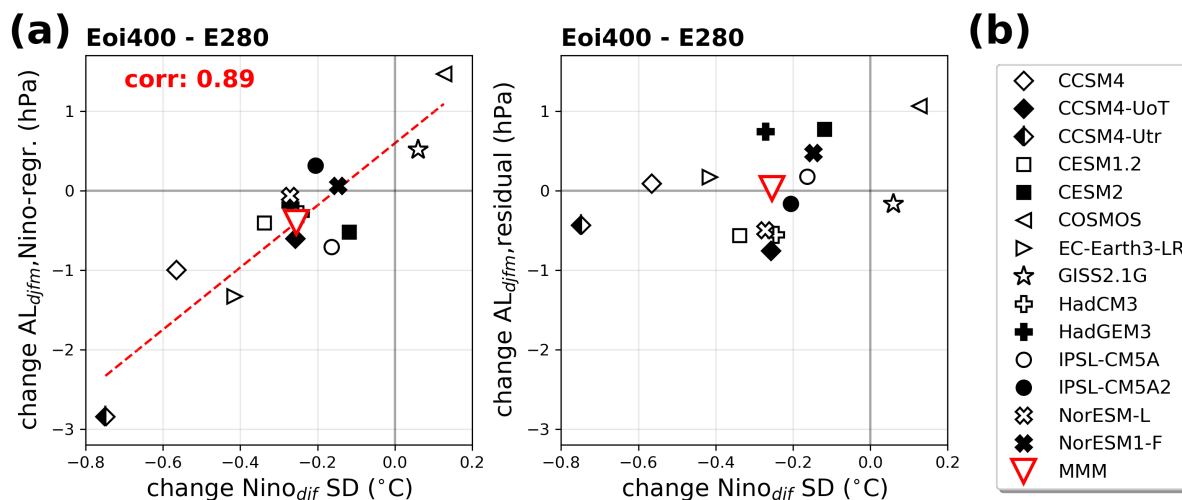

**Figure 6.** Scatter plots of the change in the Eoi400 - E280 DJF Niño3.4 SD versus (a) the change in DJFM AL variability that regresses with Niño (Niño-regr.) and (b) the change in the residual DJFM AL variability. Red triangle is the multi-model mean (MMM). Red dashed line in (a) is a linear fit through the points, with a significant correlation coefficient of 0.89. Multi-model correlation in (b) is not statistically significant (i.e.  $p\text{-value} > 0.05$ ).

of the ENSO-related AL variability, where 10 of the 14 models agree with that sign of change. The ensemble mean residual AL variability shows no change, with 7 models showing a reduction and 7 an increase. The results indicate that change in total AL variability is primarily driven by change in ENSO. The residual AL variability does change slightly per model (mean absolute error (mae) of 0.47 hPa), but on average less than the ENSO-related part (mae of 0.79 hPa). Since the residual variability is similar and dominates the total AL variability (see Figure 5), the total AL variability does not seem to change much in the mid-Pliocene along the ensemble, even though ENSO is suppressed.

### 3.4 ENSO and AL variability response in relation to climate sensitivities

Oldeman et al. (2023) use sensitivity simulations to show that CCSM4-Utr’s Eoi400 North Pacific variability response is largely dictated by the response to the mid-Pliocene BCs (e.g. closed Arctic gateways, reduced ice sheets, etc.), and not by the response to elevated CO<sub>2</sub>. They hypothesize that this is related to the relatively high sensitivity of the model to the mid-Pliocene BCs compared to its sensitivity to elevated CO<sub>2</sub>, in terms of global mean temperature response and compared to the PlioMIP2 ensemble. In this section we will investigate this issue in more detail by looking at the ENSO change and AL change in response to mid-Pliocene boundary conditions and elevated CO<sub>2</sub> using sensitivity simulations from a subset of the PlioMIP2 models.

Figure 7(a) shows the relative change in ENSO variability and AL variability in response to elevated CO<sub>2</sub> (in red), mid-Pliocene BCs (in blue) and the ‘total’ mid-Pliocene (i.e. the Eoi400 simulation, in black). There is a clear separation of responses to both forcings. In response to elevated CO<sub>2</sub>, 5 out of 6 simulations show increased AL variability, of which 4 also

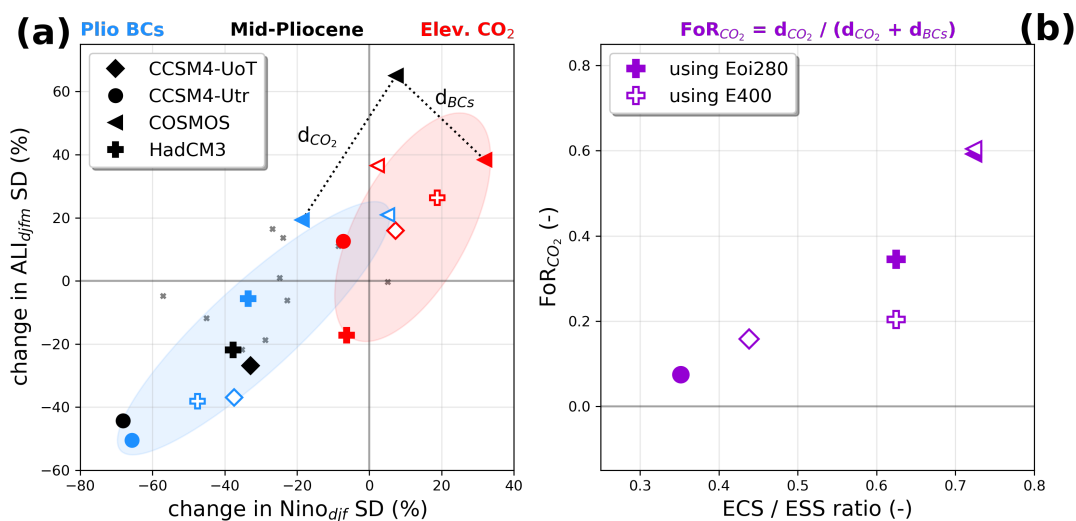

**Figure 7.** (a) Scatter plot of relative change in DJF Niño3.4 SD vs relative change in DJFM AL variability, for a subset of the PlioMIP2 ensemble and using sensitivity studies. In black the total mid-Pliocene response (Eoi400 - E280), in red the response to elevated CO<sub>2</sub> (E400 - E280, white markers and Eoi400 - Eoi280, filled markers) and in blue the response to mid-Pliocene BCs (Eoi400 - E400, white markers and Eoi280 - E280, filled markers). In small crosses the Eoi400 - E280 responses of remaining PlioMIP2 models. Note the different markers used per model compared to previous figures. (b) Fraction of ENSO-AL response (FoR) due to elevated CO<sub>2</sub> as a function of the ratio between ECS and ESS. FoR defined using the distances (in terms of ENSO change and AL change) between the different simulations (see Methods section for details). ECS and ESS listed in Table 1.

show slightly increased ENSO variability. In response to the mid-Pliocene BCs, 5 out of 6 simulations show reduced ENSO variability, of which 4 also show reduced AL variability. It indicates a ‘tug-of-war’ between the opposite ENSO-AL responses to either mid-Pliocene BCs or elevated CO<sub>2</sub>, where the total mid-Pliocene (Eoi400) response differs per model, explaining the ensemble spread in Figure 2(c). We argue that whichever forcing ‘wins’ this tug-of-war is related to the model sensitivity. Figure 7(b) shows the fraction of the ENSO-AL response which is due to elevated CO<sub>2</sub> as a function of the ratio between the model sensitivity to elevated CO<sub>2</sub> (i.e. ECS) and the total mid-Pliocene climate sensitivity (ESS). It indicates that a positive relation exists between the ECS / ESS ratio and the fraction of the ENSO-AL response due to elevated CO<sub>2</sub>. The larger the relative model sensitivity to CO<sub>2</sub>, the more of the ENSO-AL response is related to elevated CO<sub>2</sub>, and likewise the larger the relative model sensitivity to the mid-Pliocene BCs, the more of the ENSO-AL response is related to the mid-Pliocene BCs. This relationship is not necessarily intuitive; both ECS and ESS are a measure of the annual mean global mean surface temperature change in response to a certain (combination of) forcing(s), while the fraction of ENSO-AL response is related to the change of ENSO and AL variability in boreal winter due to different forcings. It demonstrates that the (relative) sensitivity of a climate model to a specific forcing is connected with more responses of the climate system than just global mean temperature change.



## 4 Discussion

### 4.1 Performance of PlioMIP2 with regards to observations and ensemble spread

In this section we discuss the performance of the PlioMIP2 ensemble in assessing changes to the ENSO - AL teleconnection in the mid-Pliocene, in terms of both comparing pre-industrial result with NOAA observations as well as within-ensemble performance. The PlioMIP2 models are generally better in reproducing the amplitude of ENSO variability compared to NOAA observations (Figure 2a, for more detail see Oldeman et al. (2021)). The model that reproduces the NOAA observations best in the pre-industrial is NorESM-L, which also shows changes to ENSO and AL variability in the mid-Pliocene that are very close to the MMM (Figure 2c). Most models overestimate the ENSO - AL regression strength (Figure 3a), which is not surprising considering that the amplitude of ENSO variability is similar, that the amplitude of AL variability is overestimated, and that the correlation coefficient between ENSO and AL indices is similar for most E280 simulations and NOAA observations (Supplementary Material Figure S3). The shape and amplitude of the pre-industrial MMM ENSO - precipitation relation (Figure 4b) is similar to NOAA observations, as well as similar to the response in present-day simulations with higher resolution models (Williams et al., 2024). The fraction of AL variance related to ENSO is overestimated in the E280 MMM compared to NOAA observations (Figure 5). An important feature is that the AL variance fraction of the residual is larger than the fraction of AL variance related to ENSO, which is captured by all E280 simulations except for CCSM4-Utr. Finally, it should be noted that any discrepancies between NOAA observations and the pre-industrial simulations can also arise from the fact that we are comparing equilibrated pre-industrial simulations with historical observations. Even though the observations have been detrended, there will be an anthropogenic signal present which is absent from the simulations considered.

In terms of ENSO and AL change (i.e. Figures 2c, 6, 7a), the clear end-members of the ensemble are CCSM4-Utr one the one hand, showing largest reduction in ENSO and AL variability, and COSMOS on the other hand, showing largest increase in ENSO and AL variability. Our results show that this spread in responses is related to the relative model sensitivities of these two models to either the Pliocene BCs or elevated CO<sub>2</sub> (Figure 7b). COSMOS is one of the coarsest models in terms of ocean and atmosphere resolution (Table 1). Its E280 simulation performs well in terms of AL variability, compared to NOAA observations, but the ENSO variability is greatly overestimated. Williams et al. (2024) show improved simulation of the ENSO - AL teleconnection with increased model resolution. CCSM4-Utr, on the other hand, performs well in terms of ENSO variability but substantially overestimates AL variability, compared to NOAA observations. However, as shown in Oldeman et al. (2023), the patterns of North Pacific atmospheric variability (i.e. the spatial patterns, amplitudes, and variance fractions of the PNA and NPO) are very well reproduced, even though the total amplitude is overestimated.

### 4.2 Changes in the residual Aleutian low variability

We find that in the mid-Pliocene, a change in AL variability is related to a change in ENSO variability (Figure 2c). This relation is originating from a change in AL variability which is linearly covarying with the ENSO signal (Figure 6a). The residual AL variability also changes, but the change is model-dependent, and not related to a change in ENSO variability (Figure 6b). Can we determine what this change in residual AL variability in the PlioMIP2 is related to?



#### 4.2.1 Nonlinear ENSO interactions

320 We separated the AL variability in an ENSO-related and residual part following a LRM. This implies that the residual AL  
variability will also contain nonlinear ENSO contributions. Any nonlinear atmospheric response to ENSO SST variability can  
be considered a sum of nonlinear responses to a linear ENSO and linear responses to a nonlinear ENSO (Frauen et al., 2014).  
ENSO variability is known to be nonlinear, originating from diversity in ENSO events, as well as asymmetry in pattern and  
duration between El Niño and La Niña events (e.g. Ashok et al., 2007; Yeh et al., 2009; Okumura, 2019; Cai et al., 2021). In the  
325 PlioMIP2 ensemble mean, both the skewness of the Niño3.4 index and the ratio between central Pacific and East Pacific ENSO  
events is unchanged compared to the pre-industrial (Oldeman et al., 2021). However, there is a considerable model spread,  
both in terms of change in the mid-Pliocene, and difference with observations. The atmospheric response to ENSO variability  
is complex and known to encompass nonlinearity originating from a variety of factors (e.g. Yeh et al., 2018; Domeisen  
et al., 2019; Jiménez-Esteve and Domeisen, 2019), the main factor being the nonlinear relationship between ENSO variability  
330 and tropical precipitation (Deser and Wallace, 1990). This nonlinear ENSO-precipitation relationship changes in a warming  
climate (Yun et al., 2021). Only about half of the PlioMIP2 models capture the nonlinear nature of the ENSO-precipitation  
relationship (Pontes et al., 2022). So, nonlinearity in the atmospheric response to ENSO could explain some of the residual  
AL variability, with the important notion that there is a considerable spread in the PlioMIP2 ensemble in terms of skill in  
reproducing nonlinear atmospheric responses to ENSO. Considering ENSO diversity and its nonlinear interactions, removing  
335 ENSO influence from North Pacific variability using linear regression might not always be the best option (Zhao et al., 2021).  
Improving the separation of (nonlinear) ENSO influence from the North Pacific variability response in the PlioMIP2 is outside  
of the scope of this work.

#### 4.2.2 Stochastic internal variability

Apart from the deterministic link with the tropics via the atmospheric bridge, AL variability is forced by internal stochastic  
340 variability originating from the extra-tropical atmosphere (Di Lorenzo et al., 2013; Newman et al., 2016). Indeed, the existence  
of modes of winter variability in the North Hemisphere atmosphere can largely be explained by internal or stochastic variability  
(Branstator, 2002; Branstator and Selten, 2009). Idealized models with no ENSO variability or ocean dynamics show that  
the dominant SLP variability in the North Pacific is located in the Aleutian low region, resulting from internal atmospheric  
dynamics (Pierce, 2001; Alexander, 2010). Modes of variability in the Northern Hemisphere extratropics such as the NAO  
345 and Arctic Oscillation, but also Pacific modes such as the PNA, are related to variability of the jet streams (e.g. Ambaum  
et al., 2001; Linkin and Nigam, 2008), and are related to each other through a circumglobal teleconnection (e.g. Barnston  
and Livezey, 1987; Branstator, 2002). It suggests that changes in atmospheric circulation originating from the mid-Pliocene  
boundary conditions (f.e. the reduced Greenland ice sheet) can ultimately lead to changes in atmospheric variability in the  
North Pacific. Research on the last glacial maximum atmosphere indeed show a distorted pattern of variability in the North  
350 Pacific, related to jet stream changes originating from changes in ice sheet extent, and not related to ENSO (Hu et al., 2020).  
Apart from the internal atmospheric dynamics, North Pacific winter atmospheric variability has been linked to variations in





sea-ice extent and North Pacific SSTs (e.g. Linkin and Nigam, 2008; Hurwitz et al., 2012; Simon et al., 2022). Across the PlioMIP2 ensemble, changes in mid-Pliocene sea-ice extent (via De Nooijer et al., 2020) or North Pacific SSTs do not relate to changes in the residual AL variability (Supplementary Material Figure S6). Garfinkel et al. (2020) show that patterns in the North Pacific wintertime atmosphere can be explained by a sum of forcings related to the land-sea contrast, heat fluxes in the ocean, and topography. In the mid-Pliocene simulations, the land-sea contrast is different due to changes in the land-sea mask as well as vegetation and lakes, and the topography is different, albeit not substantially. Differences in ocean heat fluxes could originate from the closure of the Arctic gateways, which has been shown to cause a strengthening of the mid-Pliocene AMOC (Weiffenbach et al., 2023). Changes in the AMOC and changes in the Arctic surface temperatures do not relate to changes in the residual AL variability (Supplementary Material Figure S6). Considering that every climate model will have different sensitivities of its internal atmospheric variability response to the different mid-Pliocene boundary conditions, it might be hard, if not impossible, to find one common driver that is able to explain changes to the residual AL variability in the mid-Pliocene.

### 4.3 Synthesis of tropical-North Pacific variability in the PlioMIP2

In the last part of this Discussion, we present a synthesis of the results presented in this paper on the mid-Pliocene changes in North Pacific atmosphere variability, combined with other published results using PlioMIP2 data, specifically regarding tropical-North Pacific variability (Oldeman et al., 2021; Pontes et al., 2022; Canal-Solis et al., 2024) as well as Indo-Pacific tropical mean climate (Han et al., 2021; Ren et al., 2023; Zhang et al., 2024). Figure 8 presents a summary view of the interactions of mid-Pliocene tropical and extratropical variability and mean state changes, according to the PlioMIP2 multi-model mean.

In the PlioMIP2, ENSO variability is suppressed (Oldeman et al., 2021), which is caused by a series of off-equatorial processes triggered by a northward displacement of the Pacific ITCZ (Pontes et al., 2022). In the tropical Indo-Pacific mean climate, the rising branch of the Pacific Walker circulation (PWC) is shifted westwards, both in the annual mean (Han et al., 2021) and in boreal winter (Zhang et al., 2024). Furthermore, the Indian Ocean, the Maritime Continent and the WEP warm, but the Indian Ocean warms more than the WEP (Ren et al., 2023). We hypothesize that the westward shift of the PWC, the Indo-Pacific warming asymmetry and the ENSO suppression are related, and we find that there is indeed a significant ensemble correlation between the change of these three variables (Supplementary Material Figure S7). Explaining the direction and causality of these links is out of the scope of this work.

In the present-day extratropics, ENSO forces AL variability and PDO variability, AL variability is also forced by internal stochastic variability which is dominant, and PDO variability is also forced by the AL variability which is dominant over ENSO forcing (e.g. Trenberth and Hurrell, 1994; Di Lorenzo et al., 2013; Newman et al., 2016). In the PlioMIP2, the amplitude of PDO variability is similar to the pre-industrial, and ENSO leads PDO variability with a similar correlation (Canal-Solis et al., 2024). In this study, we find that the amplitude of AL variability is also similar, and that the leading regression with ENSO is largely unchanged. Furthermore, the internal stochastic atmospheric variability forcing AL variability is similar. So, despite ENSO being suppressed, AL variability is similar, because the dominant driver (internal variability) is similar as in the pre-industrial. Likewise, PDO variability is similar despite ENSO being suppressed, because the dominant driver (AL variability) is

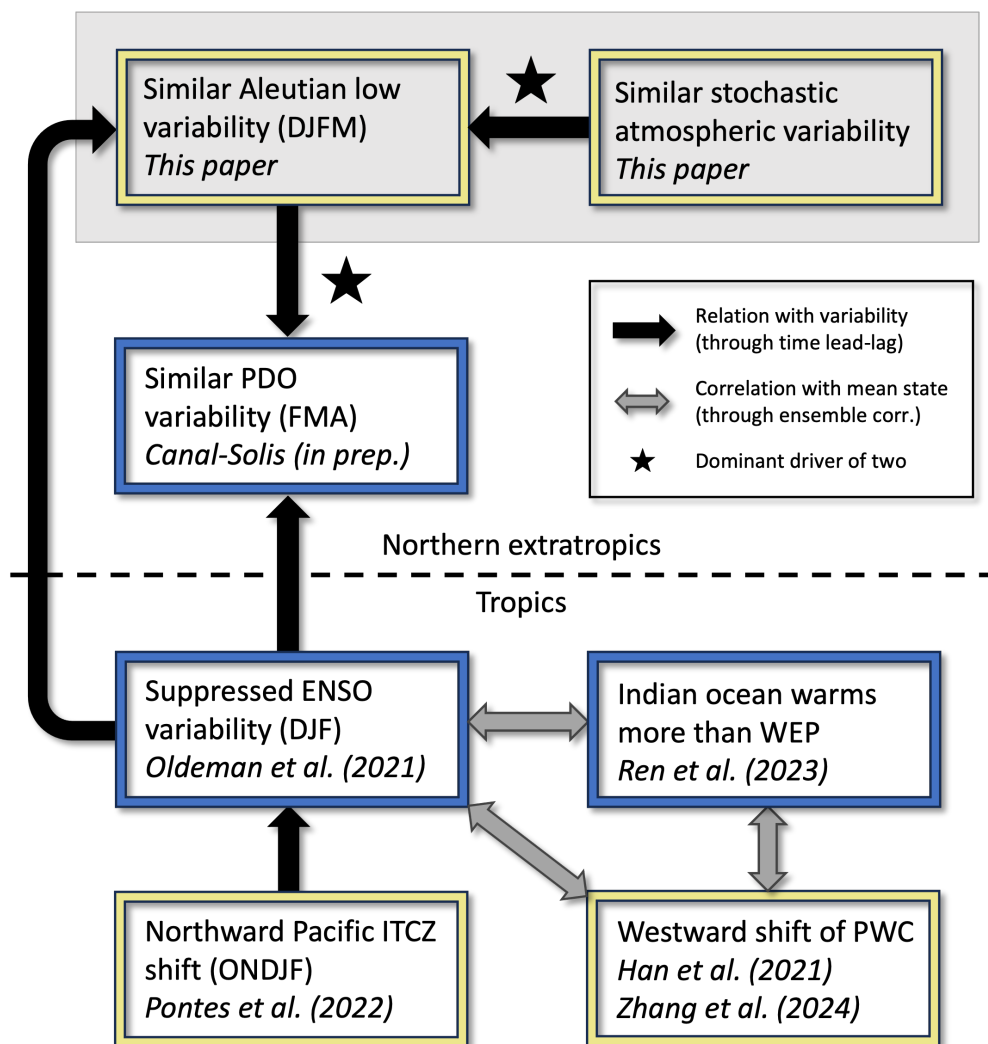

**Figure 8.** Summary view of interactions and mechanisms of mid-Pliocene tropical and extratropical variability in the North Pacific, according to the PlioMIP2 multi-model mean. Blue boxes are ocean features, yellow boxes are atmosphere features. Black arrows are relationships with variability of which we know the direction of influence (through lead-lag), grey arrows are relationships with the mean state (through ensemble correlations) of which we do not know the direction, ★ indicates the dominant driver out of two main drivers. Grey box indicates features primarily assessed in the present study.

similar as in the pre-industrial. We do confirm that also in the PlioMIP2, AL variability leads the PDO, with a higher correlation than with ENSO (Supplementary Material Figure S1).

The benefit of the view presented in Figure 8 is that we are able to combine previously published results on changes to (extra-)tropical variability and mean climate in the PlioMIP2 to the results of this study. It provides a view that shows the 390 PlioMIP2 multi-model mean change tendency, with which (generally) a majority of the models agree. A weakness, however,



is that information on spread in the ensemble is not included. For example, while a clear majority of the PlioMIP2 ensemble show a westward shift of the PWC (11 out of 13, Han et al., 2021) and reduced ENSO variability (15 out of 17, Oldeman et al., 2021), the change in AL variability is similar according to the ensemble mean but most models show a substantial change which is either positive or negative. In this specific example, we have described these opposing responses as a ‘tug-of-war’  
395 between different responses to different boundary conditions (Figure 7). In conclusion, the ensemble mean view can provide useful information, but it can conceal a range of changes in opposing directions, that can relate to the amplitude of a more obvious change in one direction.

## 5 Conclusions

The mid-Pliocene is the most recent geological period with similar atmospheric CO<sub>2</sub> concentrations as the present-day, and  
400 similar surface temperatures as projected at the end of this century for a moderate warming scenario. According to the mid-Pliocene modelling ensemble PlioMIP2, ENSO variability was suppressed (Oldeman et al., 2021; Pontes et al., 2022). In this study, we investigate how variability in the North Pacific atmosphere responds to a suppressed ENSO in the warm mid-Pliocene climate, according to the PlioMIP2 ensemble.

We find limited changes to the variability of the Aleutian Low (AL) in the multi-model mean compared to the pre-industrial.  
405 Models with a similar ENSO variability show an increase in AL variability in the mid-Pliocene, while models with a suppressed ENSO variability also show suppressed AL variability. The majority of the ensemble show relatively little change in ENSO - AL teleconnection strength. We separate the AL variability in a part that regresses with ENSO, and a residual, which mainly represents internal variability. We find, agreeing with observations, that most of the AL variance is explained by the residual, and a smaller part by the variability that regresses with ENSO, in both climates. The change in ENSO-related AL variability is  
410 strongly related to the change in ENSO itself, while the change in the residual AL variability is not related to ENSO change. A brief investigation does not reveal one change that is able to explain changes in the residual AL variability for the whole ensemble. We find that the specific change in ENSO and AL variability depends on the relative model sensitivity to either elevated CO<sub>2</sub> or to the other mid-Pliocene boundary conditions, that include closed Arctic gateways and reduced ice sheet extent. Specifically, models that are relatively more sensitive to elevated CO<sub>2</sub> generally show ENSO variability that is similar  
415 or increased compared to the pre-industrial, and AL variability that is increased, while models that are relatively more sensitive to the mid-Pliocene boundary conditions generally show reduced ENSO and similar or reduced AL variability.

We present a summary perspective of tropical-North Pacific variability in the PlioMIP2, combining our results with literature. Changes in the tropical Pacific mean climate result in a suppression of the mid-Pliocene ENSO variability, but since the dominant internal variability in the North Pacific extratropics is largely unchanged, both AL variability in the atmosphere  
420 and PDO variability in the ocean are similar to the pre-industrial and not necessarily suppressed. Evaluating the effect of past climate boundary conditions, including changes to ice sheets and Arctic gateways, on the internal variability of the extratropical atmosphere is a topic for future research.



While the mid-Pliocene is not a perfect analogue for near-future climate, investigating atmosphere - ocean interactions in the mid-Pliocene provides a useful view of the functioning of the Earth system under different forcings. Our results show that teleconnections of a suppressed ENSO in a warmer past climate are quite robust. Furthermore, we are able to explain how suppressed ENSO variability does not have to lead to a suppression of its connected modes of variability in the North Pacific. Lastly, we demonstrate that in addition to equilibrium climate sensitivity, we need Earth system sensitivity in order to explain the spread in simulated climate variability responses in the mid-Pliocene.

*Code and data availability.* Codes (python and Jupyter notebooks) for pre-processing the data, analysing and generating the figures are available on Github and published on Zenodo (Oldeman, 2024). The PlioMIP2 model data used in this work are available from the PlioMIP2 database upon request from Alan M. Haywood (a.m.haywood@leeds.ac.uk). PlioMIP2 data from CESM2, EC-Earth3.3, NorESM1-F, IPSL-CM6A, GISS2.1G and HadGEM3 can be obtained from the Earth System Grid Federation (<https://esgf-node.llnl.gov/search/cmip6/>). NOAA Extended Reconstructed SST V5 data provided by the NOAA PSL, Boulder, Colorado, USA, from their website at <https://psl.noaa.gov/data/gridded/data.noaa.ersst.v5.html>. NOAA/CIRES/DOE 20th Century Reanalysis (V3) data provided by the NOAA PSL, Boulder, Colorado, USA, from their website at [https://psl.noaa.gov/data/gridded/data.20thC\\_ReanV3.html](https://psl.noaa.gov/data/gridded/data.20thC_ReanV3.html).

*Author contributions.* All authors contributed to the ideas leading to this work. AMO performed the analyses, made the figures and wrote the manuscript. MLJ, ASH, FMS and HAD provided comments to the paper.

*Competing interests.* The authors declare no competing interests

*Acknowledgements.* This work was carried out under the program of the Netherlands Earth System Science Centre (NESSC), financially supported by the Ministry of Education, Culture and Science (OCW grant no. 024.002.001). We thank the PlioMIP2 climate modelling groups for producing and making available their model output. The authors would like to thank Zixuan Han for providing PlioMIP2 data on the Pacific Walker circulation.

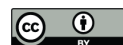

## References

- Alexander, M.: Extratropical air-sea interaction, sea surface temperature variability, and the Pacific Decadal Oscillation, in: *Geophysical Monograph Series*, edited by Sun, D.-Z. and Bryan, F., vol. 189, pp. 123–148, American Geophysical Union, Washington, D. C., ISBN 978-0-87590-480-1, <https://onlinelibrary.wiley.com/doi/10.1029/2008GM000794>, 2010.
- Alexander, M. A., Bladé, I., Newman, M., Lanzante, J. R., Lau, N. C., and Scott, J. D.: The atmospheric bridge: The influence of ENSO teleconnections on air-sea interaction over the global oceans, *Journal of Climate*, 15, 2205–2231, [https://doi.org/10.1175/1520-0442\(2002\)015<2205:TABTIO>2.0.CO;2](https://doi.org/10.1175/1520-0442(2002)015<2205:TABTIO>2.0.CO;2), 2002.
- 445 Ambaum, M. H., Hoskins, B. J., and Stephenson, D. B.: Arctic Oscillation or North Atlantic Oscillation?, *Journal of Climate*, 14, 3495–3507, [https://doi.org/10.1175/1520-0442\(2001\)014<3495:AONAO>2.0.CO;2](https://doi.org/10.1175/1520-0442(2001)014<3495:AONAO>2.0.CO;2), 2001.
- Ashok, K., Behera, S. K., Rao, S. A., Weng, H., and Yamagata, T.: El Niño Modoki and its possible teleconnection, *Journal of Geophysical Research*, 112, C11 007, <https://doi.org/10.1029/2006JC003798>, 2007.
- Baatsen, M. L. J., von der Heydt, A. S., Kliphuis, M. A., Oldeman, A. M., and Weiffenbach, J. E.: Warm mid-Pliocene conditions without high climate sensitivity: the CCSM4-Utrecht (CESM 1.0.5) contribution to the PlioMIP2, *Climate of the Past*, 18, 657–679, <https://doi.org/10.5194/cp-18-657-2022>, 2022.
- 455 Barnston, A. G. and Livezey, R. E.: Classification, Seasonality and Persistence of Low-Frequency Atmospheric Circulation Patterns, *Monthly Weather Review*, 115, 1083–1126, [https://doi.org/10.1175/1520-0493\(1987\)115<1083:CSAPOL>2.0.CO;2](https://doi.org/10.1175/1520-0493(1987)115<1083:CSAPOL>2.0.CO;2), 1987.
- Beobide-Arsuaga, G., Bayr, T., Reintges, A., and Latif, M.: Uncertainty of ENSO-amplitude projections in CMIP5 and CMIP6 models, *Climate Dynamics*, 56, 3875–3888, <https://doi.org/10.1007/s00382-021-05673-4>, publisher: Springer Berlin Heidelberg ISBN: 0123456789, 2021.
- 460 Branstator, G.: Circumglobal Teleconnections, the Jet Stream Waveguide, and the North Atlantic Oscillation, *Journal of Climate*, 15, 1893–1910, [https://doi.org/10.1175/1520-0442\(2002\)015<1893:CTTJSW>2.0.CO;2](https://doi.org/10.1175/1520-0442(2002)015<1893:CTTJSW>2.0.CO;2), 2002.
- Branstator, G. and Selten, F.: “Modes of Variability” and Climate Change, *Journal of Climate*, 22, 2639–2658, <https://doi.org/10.1175/2008JCLI2517.1>, 2009.
- 465 Brierley, C. M.: Interannual climate variability seen in the Pliocene Model Intercomparison Project, *Climate of the Past*, 11, 605–618, <https://doi.org/10.5194/cp-11-605-2015>, 2015.
- Burke, K. D., Williams, J. W., Chandler, M. A., Haywood, A. M., Lunt, D. J., and Otto-Bliesner, B. L.: Pliocene and Eocene provide best analogs for near-future climates, *Proceedings of the National Academy of Sciences of the United States of America*, 115, 13 288–13 293, <https://doi.org/10.1073/pnas.1809600115>, 2018.
- 470 Cai, W., Wu, L., Lengaigne, M., Li, T., McGregor, S., Kug, J. S., Yu, J. Y., Stuecker, M. F., Santoso, A., Li, X., Ham, Y. G., Chikamoto, Y., Ng, B., McPhaden, M. J., Du, Y., Dommenges, D., Jia, F., Kajtar, J. B., Keenlyside, N., Lin, X., Luo, J. J., Martín-Rey, M., Ruprich-Robert, Y., Wang, G., Xie, S. P., Yang, Y., Kang, S. M., Choi, J. Y., Gan, B., Kim, G. I., Kim, C. E., Kim, S., Kim, J. H., and Chang, P.: Pantropical climate interactions, *Science*, 363, <https://doi.org/10.1126/science.aav4236>, 2019.
- Cai, W., Santoso, A., Collins, M., Dewitte, B., Karamperidou, C., Kug, J.-S., Lengaigne, M., McPhaden, M. J., Stuecker, M. F., Taschetto, A. S., Timmermann, A., Wu, L., Yeh, S.-W., Wang, G., Ng, B., Jia, F., Yang, Y., Ying, J., Zheng, X.-T., Bayr, T., Brown, J. R., Capotondi, A., Cobb, K. M., Gan, B., Geng, T., Ham, Y.-G., Jin, F.-F., Jo, H.-S., Li, X., Lin, X., McGregor, S., Park, J.-H., Stein, K., Yang, K., Zhang, L., and Zhong, W.: Changing El Niño–Southern Oscillation in a warming climate, *Nature Reviews Earth & Environment*, 0123456789, <https://doi.org/10.1038/s43017-021-00199-z>, ISBN: 0123456789, 2021.



- 480 Callahan, C. W., Chen, C., Rugenstein, M., Bloch-Johnson, J., Yang, S., and Moyer, E. J.: Robust decrease in El Niño/Southern Oscillation amplitude under long-term warming, *Nature Climate Change*, 11, 752–757, <https://doi.org/10.1038/s41558-021-01099-2>, 2021.
- Canal-Solis, K., Tindall, J., Oldeman, A., and Haywood, A.: The Mid-Pliocene Pacific Decadal Oscillation is the leading mode of climate variability in the Pacific basin on a centennial scale, in prep., 2024.
- Chan, W.-L. and Abe-Ouchi, A.: Pliocene Model Intercomparison Project (PlioMIP2) simulations using the Model for Interdisciplinary Research on Climate (MIROC4m), *Climate of the Past*, 16, 1523–1545, <https://doi.org/10.5194/cp-16-1523-2020>, 2020.
- 485 Chandan, D. and Peltier, W. R.: Regional and global climate for the mid-Pliocene using the University of Toronto version of CCSM4 and PlioMIP2 boundary conditions, *Climate of the Past*, 13, 919–942, <https://doi.org/10.5194/cp-13-919-2017>, 2017.
- Chen, S., Chen, W., Wu, R., Yu, B., and Graf, H.-F.: Potential Impact of Preceding Aleutian Low Variation on El Niño–Southern Oscillation during the Following Winter, *Journal of Climate*, 33, 3061–3077, <https://doi.org/10.1175/JCLI-D-19-0717.1>, 2020.
- 490 Chen, Z., Gan, B., Wu, L., and Jia, F.: Pacific–North American teleconnection and North Pacific Oscillation: historical simulation and future projection in CMIP5 models, *Climate Dynamics*, 50, 4379–4403, <https://doi.org/10.1007/s00382-017-3881-9>, 2018.
- Chiang, J. C. H. and Vimont, D. J.: Analogous Pacific and Atlantic Meridional Modes of Tropical Atmosphere–Ocean Variability, *Journal of Climate*, 17, 4143–4158, <https://doi.org/10.1175/JCLI4953.1>, 2004.
- de la Vega, E., Chalk, T. B., Wilson, P. A., Bysani, R. P., and Foster, G. L.: Atmospheric CO<sub>2</sub> during the Mid-Piacenzian Warm Period and the M2 glaciation, *Scientific Reports*, 10, 9–16, <https://doi.org/10.1038/s41598-020-67154-8>, 2020.
- 495 De Nooijer, W., Zhang, Q., Li, Q., Zhang, Q., Li, X., Zhang, Z., Guo, C., Nisancioglu, K. H., Haywood, A. M., Tindall, J. C., Hunter, S. J., Dowsett, H. J., Stepanek, C., Lohmann, G., Otto-Bliesner, B. L., Feng, R., Sohl, L. E., Chandler, M. A., Tan, N., Contoux, C., Ramstein, G., Baatsen, M. L., Von Der Heydt, A. S., Chandan, D., Peltier, W. R., Abe-Ouchi, A., Chan, W. L., Kamae, Y., and Brierley, C. M.: Evaluation of Arctic warming in mid-Pliocene climate simulations, *Climate of the Past*, 16, 2325–2341, <https://doi.org/10.5194/cp-16-2325-2020>, 2020.
- 500 Deser, C. and Wallace, J. M.: Large-Scale Atmospheric Circulation Features of Warm and Cold Episodes in the Tropical Pacific, *Journal of Climate*, 3, 1254–1281, [https://doi.org/10.1175/1520-0442\(1990\)003<1254:LSACFO>2.0.CO;2](https://doi.org/10.1175/1520-0442(1990)003<1254:LSACFO>2.0.CO;2), 1990.
- Deser, C., Simpson, I. R., McKinnon, K. A., and Phillips, A. S.: The Northern Hemisphere Extratropical Atmospheric Circulation Response to ENSO: How Well Do We Know It and How Do We Evaluate Models Accordingly?, *Journal of Climate*, 30, 5059–5082, <https://doi.org/10.1175/JCLI-D-16-0844.1>, 2017.
- 505 Di Lorenzo, E. and Mantua, N.: Multi-year persistence of the 2014/15 North Pacific marine heatwave, *Nature Climate Change*, 6, 1042–1047, <https://doi.org/10.1038/nclimate3082>, 2016.
- Di Lorenzo, E., Combes, V., Keister, J., Strub, P. T., Thomas, A., Franks, P., Ohman, M., Furtado, J., Bracco, A., Bograd, S., Peterson, W., Schwing, F., Chiba, S., Taguchi, B., Hormazabal, S., and Parada, C.: Synthesis of Pacific Ocean Climate and Ecosystem Dynamics, *Oceanography*, 26, 68–81, <https://doi.org/10.5670/oceanog.2013.76>, 2013.
- 510 Domeisen, D. I., Garfinkel, C. I., and Butler, A. H.: The Teleconnection of El Niño Southern Oscillation to the Stratosphere, *Reviews of Geophysics*, 57, 5–47, <https://doi.org/10.1029/2018RG000596>, 2019.
- Dowsett, H., Dolan, A., Rowley, D., Moucha, R., Forte, A. M., Mitrovica, J. X., Pound, M., Salzmann, U., Robinson, M., Chandler, M., Foley, K., and Haywood, A.: The PRISM4 (mid-Piacenzian) paleoenvironmental reconstruction, *Climate of the Past*, 12, 1519–1538, <https://doi.org/10.5194/cp-12-1519-2016>, 2016.
- 515 Eyring, V., Gillet, N., Achuta Rao, K., Barimalala, R., Barreiro Parrillo, M., Bellouin, N., Cassou, C., Durack, P., Kosaka, Y., McGregor, S., Min, S., Morgenstern, O., and Sun, Y.: Human Influence on the Climate System (Chapter 3), in: *Climate Change 2021: The Physical*



- Science Basis. Contribution of Working Group I to the Sixth Assessment Report of the Intergovernmental Panel on Climate Change, pp. 423–552, Cambridge University Press, doi: 10.1017/9781009157896.005, 2021.
- 520 Fedorov, A. V., Dekens, P. S., McCarthy, M., Ravelo, A. C., DeMenocal, P. B., Barreiro, M., Pacanowski, R. C., and Philander, S. G.: The Pliocene paradox (mechanisms for a permanent El Niño), *Science*, 312, 1485–1489, <https://doi.org/10.1126/science.1122666>, 2006.
- Feng, R., Otto-Bliesner, B. L., Brady, E. C., and Rosenbloom, N.: Increased Climate Response and Earth System Sensitivity From CCSM4 to CESM2 in Mid-Pliocene Simulations, *Journal of Advances in Modeling Earth Systems*, 12, <https://doi.org/10.1029/2019MS002033>, 2020.
- 525 Frauen, C., Dommenges, D., Tyrrell, N., Rezny, M., and Wales, S.: Analysis of the Nonlinearity of El Niño–Southern Oscillation Teleconnections\*, *Journal of Climate*, 27, 6225–6244, <https://doi.org/10.1175/JCLI-D-13-00757.1>, 2014.
- Fredriksen, H. B., Berner, J., Subramanian, A. C., and Capotondi, A.: How Does El Niño–Southern Oscillation Change Under Global Warming—A First Look at CMIP6, *Geophysical Research Letters*, 47, <https://doi.org/10.1029/2020GL090640>, 2020.
- Garfinkel, C. I., White, I., Gerber, E. P., Jucker, M., and Erez, M.: The Building Blocks of Northern Hemisphere Wintertime Stationary  
530 Waves, *Journal of Climate*, 33, 5611–5633, <https://doi.org/10.1175/JCLI-D-19-0181.1>, 2020.
- Han, Z., Zhang, Q., Li, Q., Feng, R., Haywood, A. M., Tindall, J. C., Hunter, S. J., Otto-Bliesner, B. L., Brady, E. C., Rosenbloom, N., Zhang, Z., Li, X., Guo, C., Nisancioglu, K. H., Stepanek, C., Lohmann, G., Sohl, L. E., Chandler, M. A., Tan, N., Ramstein, G., Baatsen, M. L. J., von der Heydt, A. S., Chandan, D., Peltier, W. R., Williams, C. J. R., Lunt, D. J., Cheng, J., Wen, Q., and Burls, N. J.: Evaluating the large-scale hydrological cycle response within the Pliocene Model Intercomparison Project Phase 2 (PlioMIP2) ensemble, *Climate of the Past*, 17, 2537–2558, <https://doi.org/10.5194/cp-17-2537-2021>, 2021.
- 535 Haywood, A., Tindall, J., Dowsett, H., Dolan, A., Foley, K., Hunter, S., Hill, D., Chan, W.-L., Abe-Ouchi, A., Stepanek, C., Lohmann, G., Chandan, D., Peltier, W. R., Tan, N., Contoux, C., Ramstein, G., Li, X., Zhang, Z., Guo, C., Nisancioglu, K., Zhang, Q., Li, Q., Kamae, Y., Chandler, M., Sohl, L., Otto-Bliesner, B., Feng, R., Brady, E., von der Heydt, A., Baatsen, M., and Lunt, D.: The Pliocene Model Intercomparison Project Phase 2: large-scale climate features and climate sensitivity, *Climate of The Past*, 16, 2095–2123, <https://doi.org/10.5194/cp-2019-145>, 2020.
- 540 Haywood, A., Tindall, J., Burton, L., Chandler, M., Dolan, A., Dowsett, H., Feng, R., Fletcher, T., Foley, K., Hill, D., Hunter, S., Otto-Bliesner, B., Lunt, D., Robinson, M., and Salzmann, U.: Pliocene Model Intercomparison Project Phase 3 (PlioMIP3) – Science plan and experimental design, *Global and Planetary Change*, 232, 104316, <https://doi.org/10.1016/j.gloplacha.2023.104316>, 2024.
- Haywood, A. M., Dowsett, H. J., Otto-Bliesner, B., Chandler, M. A., Dolan, A. M., Hill, D. J., Lunt, D. J., Robinson, M. M., Rosenbloom, N., Salzmann, U., and Sohl, L. E.: Pliocene model intercomparison project (PlioMIP): Experimental design and boundary conditions (Experiment 1), *Geoscientific Model Development*, 3, 227–242, <https://doi.org/10.5194/gmd-3-227-2010>, 2010.
- 545 Haywood, A. M., Ridgwell, A., Lunt, D. J., Hill, D. J., Pound, M. J., Dowsett, H. J., Dolan, A. M., Francis, J. E., and Williams, M.: Are there pre-Quaternary geological analogues for a future greenhouse warming?, *Philosophical Transactions of the Royal Society A: Mathematical, Physical and Engineering Sciences*, 369, 933–956, <https://doi.org/10.1098/rsta.2010.0317>, 2011.
- 550 Haywood, A. M., Dowsett, H. J., Dolan, A. M., Rowley, D., Abe-Ouchi, A., Otto-Bliesner, B., Chandler, M. A., Hunter, S. J., Lunt, D. J., Pound, M., and Salzmann, U.: The Pliocene Model Intercomparison Project (PlioMIP) Phase 2: Scientific objectives and experimental design, *Climate of the Past*, 12, 663–675, <https://doi.org/10.5194/cp-12-663-2016>, 2016.
- Hoskins, B. J. and Karoly, D. J.: The Steady Linear Response of a Spherical Atmosphere to Thermal and Orographic Forcing, *Journal of the Atmospheric Sciences*, 38, 1179–1196, [https://doi.org/10.1175/1520-0469\(1981\)038<1179:TSLROA>2.0.CO;2](https://doi.org/10.1175/1520-0469(1981)038<1179:TSLROA>2.0.CO;2), 1981.

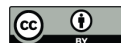

- 555 Hu, Y., Xia, Y., Liu, Z., Wang, Y., Lu, Z., and Wang, T.: Distorted Pacific-North American teleconnection at the Last Glacial Maximum, *Climate of the Past*, 16, 199–209, <https://doi.org/10.5194/cp-16-199-2020>, 2020.
- Huang, B., Thorne, P. W., Banzon, V. F., Boyer, T., Chepurin, G., Lawrimore, J. H., Menne, M. J., Smith, T. M., Vose, R. S., and Zhang, H.-M.: Extended Reconstructed Sea Surface Temperature, Version 5 (ERSSTv5): Upgrades, Validations, and Intercomparisons, *Journal of Climate*, 30, 8179–8205, <https://doi.org/10.1175/JCLI-D-16-0836.1>, 2017.
- 560 Hunter, S. J., Haywood, A. M., Dolan, A. M., and Tindall, J. C.: The HadCM3 contribution to PlioMIP phase 2, *Climate of the Past*, 15, 1691–1713, <https://doi.org/10.5194/cp-15-1691-2019>, 2019.
- Hurwitz, M. M., Newman, P. A., and Garfinkel, C. I.: On the influence of North Pacific sea surface temperature on the Arctic winter climate, *Journal of Geophysical Research*, 117, <https://doi.org/10.1029/2012JD017819>, 2012.
- Jiménez-Esteve, B. and Domeisen, D. I. V.: Nonlinearity in the North Pacific Atmospheric Response to a Linear ENSO Forcing, *Geophysical Research Letters*, 46, 2271–2281, <https://doi.org/10.1029/2018GL081226>, 2019.
- 565 Kamae, Y., Yoshida, K., and Ueda, H.: Sensitivity of Pliocene climate simulations in MRI-CGCM2.3 to respective boundary conditions, *Climate of the Past*, 12, 1619–1634, <https://doi.org/10.5194/cp-12-1619-2016>, 2016.
- Li, X., Guo, C., Zhang, Z., Helge Otterä, O., and Zhang, R.: PlioMIP2 simulations with NorESM-L and NorESM1-F, *Climate of the Past*, 16, 183–197, <https://doi.org/10.5194/cp-16-183-2020>, 2020.
- 570 Linkin, M. E. and Nigam, S.: The North Pacific Oscillation-West Pacific teleconnection pattern: Mature-phase structure and winter impacts, *Journal of Climate*, 21, 1979–1997, <https://doi.org/10.1175/2007JCLI2048.1>, 2008.
- Lurton, T., Balkanski, Y., Bastrikov, V., Bekki, S., Bopp, L., Braconnot, P., Brockmann, P., Cadule, P., Contoux, C., Cozic, A., Cugnet, D., Dufresne, J., Éthé, C., Foujols, M., Ghattas, J., Hauglustaine, D., Hu, R., Kageyama, M., Khodri, M., Lebas, N., Levavasseur, G., Marchand, M., Ottlé, C., Peylin, P., Sima, A., Szopa, S., Thiéblemont, R., Vuichard, N., and Boucher, O.: Implementation of the CMIP6 Forcing Data in the IPSL-CM6A-LR Model, *Journal of Advances in Modeling Earth Systems*, 12, e2019MS001940, <https://doi.org/10.1029/2019MS001940>, 2020.
- 575 Mo, K. C. and Livezey, R. E.: Tropical-Extratropical Geopotential Height Teleconnections during the Northern Hemisphere Winter, *Monthly Weather Review*, 114, 2488–2515, [https://doi.org/10.1175/1520-0493\(1986\)114<2488:TEGHTD>2.0.CO;2](https://doi.org/10.1175/1520-0493(1986)114<2488:TEGHTD>2.0.CO;2), 1986.
- Newman, M., Compo, G. P., and Alexander, M. A.: ENSO-forced variability of the Pacific decadal oscillation, *Journal of Climate*, 16, 3853–3857, [https://doi.org/10.1175/1520-0442\(2003\)016<3853:EVOTPD>2.0.CO;2](https://doi.org/10.1175/1520-0442(2003)016<3853:EVOTPD>2.0.CO;2), 2003.
- 580 Newman, M., Alexander, M. A., Ault, T. R., Cobb, K. M., Deser, C., Di Lorenzo, E., Mantua, N. J., Miller, A. J., Minobe, S., Nakamura, H., Schneider, N., Vimont, D. J., Phillips, A. S., Scott, J. D., and Smith, C. A.: The Pacific Decadal Oscillation, Revisited, *Journal of Climate*, 29, 4399–4427, <https://doi.org/10.1175/JCLI-D-15-0508.1>, 2016.
- Okumura, Y. M.: ENSO Diversity from an Atmospheric Perspective, *Current Climate Change Reports*, 5, 245–257, <https://doi.org/10.1007/s40641-019-00138-7>, publisher: Current Climate Change Reports, 2019.
- 585 Oldeman, A.: arthuroideman/PlioMIP2-ENSO-teleconnection: Preprint version of codes - Oldeman et al. (2024) submitted to ESD, <https://doi.org/10.5281/zenodo.10817269>, 2024.
- Oldeman, A., Baatsen, M., Von der Heydt, A., Van Delden, A., and Dijkstra, H.: Past warm climate conditions show a shift in Northern Hemisphere winter variability towards a dominant North Pacific Oscillation, *EGUsphere*, pp. 1–28, <https://doi.org/10.5194/egusphere-2023-757>, 2023.
- 590 Oldeman, A. M., Baatsen, M. L. J., von der Heydt, A. S., Dijkstra, H. A., Tindall, J. C., Abe-Ouchi, A., Booth, A. R., Brady, E. C., Chan, W.-L., Chandan, D., Chandler, M. A., Contoux, C., Feng, R., Guo, C., Haywood, A. M., Hunter, S. J., Kamae, Y., Li, Q., Li, X., Lohmann,





- G., Lunt, D. J., Nisancioglu, K. H., Otto-Bliesner, B. L., Peltier, W. R., Pontes, G. M., Ramstein, G., Sohl, L. E., Stepanek, C., Tan, N., Zhang, Q., Zhang, Z., Wainer, I., and Williams, C. J. R.: Reduced El Niño variability in the mid-Pliocene according to the PlioMIP2 ensemble, *Climate of the Past*, 17, 2427–2450, <https://doi.org/10.5194/cp-17-2427-2021>, 2021.
- 595 Philander, S.: *El Niño, La Niña, and the Southern Oscillation*, International geophysics series, Academic Press, New York, ISBN 978-0-12-553235-8, <https://books.google.nl/books?id=z1OeAQAACAAJ>, 1990.
- Pierce, D. W.: Distinguishing coupled ocean–atmosphere interactions from background noise in the North Pacific, *Progress in Oceanography*, 49, 331–352, [https://doi.org/10.1016/S0079-6611\(01\)00029-5](https://doi.org/10.1016/S0079-6611(01)00029-5), 2001.
- 600 Pontes, G. M., Taschetto, A. S., Sen Gupta, A., Santoso, A., Wainer, I., Haywood, A. M., Chan, W.-L., Abe-Ouchi, A., Stepanek, C., Lohmann, G., Hunter, S. J., Tindall, J. C., Chandler, M. A., Sohl, L. E., Peltier, W. R., Chandan, D., Kamae, Y., Nisancioglu, K. H., Zhang, Z., Contoux, C., Tan, N., Zhang, Q., Otto-Bliesner, B. L., Brady, E. C., Feng, R., von der Heydt, A. S., Baatsen, M. L. J., and Oldeman, A. M.: Mid-Pliocene El Niño/Southern Oscillation suppressed by Pacific intertropical convergence zone shift, *Nature Geoscience*, 15, 726–734, <https://doi.org/10.1038/s41561-022-00999-y>, 2022.
- 605 Ravelo, A. C., Dekens, P. S., and McCarthy, M.: Evidence for El Niño - Like conditions during the Pliocene, *GSA Today*, 16, 4–11, [https://doi.org/10.1130/1052-5173\(2006\)016<4:EFENLC>2.0.CO;2](https://doi.org/10.1130/1052-5173(2006)016<4:EFENLC>2.0.CO;2), 2006.
- Ren, X., Lunt, D. J., Hendy, E., Williams, C. J. R., Stepanek, C., Guo, C., Chandan, D., Lohmann, G., Tindall, J. C., Sohl, L. E., Chandler, M. A., Kageyama, M., Baatsen, M. L. J., Tan, N., Zhang, Q., Feng, R., Hunter, S., Chan, W.-L., Peltier, W. R., Li, X., Kamae, Y., Zhang, Z., and Haywood, A. M.: The hydrological cycle and ocean circulation of the Maritime Continent in the Pliocene: results from PlioMIP2, *Climate of The Past*, <https://doi.org/10.5194/cp-19-2053-2023>, 2023.
- 610 Scropton, N., Bonham, S. G., Rickaby, R. E., Lawrence, S. H., Hermoso, M., and Haywood, A. M.: Persistent El Niño–Southern Oscillation variation during the Pliocene Epoch, *Paleoceanography*, 26, 1–13, <https://doi.org/10.1029/2010PA002097>, 2011.
- Simon, A., Gastineau, G., Frankignoul, C., Lapin, V., and Ortega, P.: Pacific Decadal Oscillation modulates the Arctic sea-ice loss influence on the midlatitude atmospheric circulation in winter, *Weather and Climate Dynamics*, 3, 17, 2022.
- 615 Slivinski, L. C., Compo, G. P., Sardeshmukh, P. D., Whitaker, J. S., McColl, C., Allan, R. J., Brohan, P., Yin, X., Smith, C. A., Spencer, L. J., Vose, R. S., Rohrer, M., Conroy, R. P., Schuster, D. C., Kennedy, J. J., Ashcroft, L., Brönnimann, S., Brunet, M., Camuffo, D., Cornes, R., Cram, T. A., Domínguez-Castro, F., Freeman, J. E., Gergis, J., Hawkins, E., Jones, P. D., Kubota, H., Lee, T. C., Lorrey, A. M., Luterbacher, J., Mock, C. J., Przybylak, R. K., Pudmenzky, C., Slonosky, V. C., Tinz, B., Trewin, B., Wang, X. L., Wilkinson, C., Wood, K., and Wyszyński, P.: An Evaluation of the Performance of the Twentieth Century Reanalysis Version 3, *Journal of Climate*, 34, 1417–1438, <https://doi.org/10.1175/JCLI-D-20-0505.1>, 2021.
- 620 Stepanek, C., Samakinwa, E., Knorr, G., and Lohmann, G.: Contribution of the coupled atmosphere–ocean–sea ice–vegetation model COSMOS to the PlioMIP2, *Climate of the Past*, 16, 2275–2323, <https://doi.org/10.5194/cp-16-2275-2020>, 2020.
- Tan, N., Contoux, C., Ramstein, G., Sun, Y., Dumas, C., Sepulchre, P., and Guo, Z.: Modeling a modern-like pCO<sub>2</sub> warm period (Marine Isotope Stage KM5c) with two versions of an Institut Pierre Simon Laplace atmosphere–ocean coupled general circulation model, *Climate of the Past*, 16, 1–16, <https://doi.org/10.5194/cp-16-1-2020>, 2020.
- 625 Tierney, J. E., Poulsen, C. J., Montañez, I. P., Bhattacharya, T., Feng, R., Ford, H. L., Hönisch, B., Inglis, G. N., Petersen, S. V., Sahoo, N., Tabor, C. R., Thirumalai, K., Zhu, J., Burls, N. J., Foster, G. L., Goddérís, Y., Huber, B. T., Ivany, L. C., Kirtland Turner, S., Lunt, D. J., McElwain, J. C., Mills, B. J. W., Otto-Bliesner, B. L., Ridgwell, A., and Zhang, Y. G.: Past climates inform our future, *Science*, 370, eaay3701, <https://doi.org/10.1126/science.aay3701>, 2020.



- 630 Trenberth, K. E. and Hurrell, J. W.: Decadal atmosphere-ocean variations in the Pacific, *Climate Dynamics*,  
<https://doi.org/https://doi.org/10.1007/BF00204745>, 1994.
- Wara, M. W., Ravelo, A. C., and Delaney, M. L.: Climate change: Permanent El Niño-like conditions during the Pliocene warm period,  
*Science*, 309, 758–761, <https://doi.org/10.1126/science.1112596>, 2005.
- Watanabe, T., Suzuki, A., Minobe, S., Kawashima, T., Kameo, K., Minoshima, K., Aguilar, Y. M., Wani, R., Kawahata, H., Sowa, K.,  
635 Nagai, T., and Kase, T.: Permanent El Niño during the Pliocene warm period not supported by coral evidence, *Nature*, 471, 209–211,  
<https://doi.org/10.1038/nature09777>, publisher: Nature Publishing Group, 2011.
- Weiffenbach, J. E., Baatsen, M. L. J., Dijkstra, H. A., von der Heydt, A. S., Abe-Ouchi, A., Brady, E. C., Chan, W.-L., Chandan, D.,  
Chandler, M. A., Contoux, C., Feng, R., Guo, C., Han, Z., Haywood, A. M., Li, Q., Li, X., Lohmann, G., Lunt, D. J., Nisancioglu, K. H.,  
Otto-Bliesner, B. L., Peltier, W. R., Ramstein, G., Sohl, L. E., Stepanek, C., Tan, N., Tindall, J. C., Williams, C. J. R., Zhang, Q., and  
640 Zhang, Z.: Unraveling the mechanisms and implications of a stronger mid-Pliocene Atlantic Meridional Overturning Circulation (AMOC)  
in PlioMIP2, *Climate of the Past*, 19, 61–85, <https://doi.org/10.5194/cp-19-61-2023>, 2023.
- White, S. M. and Ravelo, A. C.: Dampened El Niño in the Early Pliocene Warm Period, *Geophysical Research Letters*, 47, e2019GL085 504,  
<https://doi.org/10.1029/2019GL085504>, 2020.
- Williams, C. J. R., Sellar, A. A., Ren, X., Haywood, A. M., Hopcroft, P., Hunter, S. J., Roberts, W. H. G., Smith, R. S., Stone, E. J., Tindall,  
645 J. C., and Lunt, D. J.: Simulation of the mid-Pliocene Warm Period using HadGEM3: experimental design and results from model–model  
and model–data comparison, *Climate of the Past*, 17, 2139–2163, <https://doi.org/10.5194/cp-17-2139-2021>, 2021.
- Williams, N. C., Scaife, A. A., and Screen, J. A.: Effect of increased ocean resolution on model errors in El Niño–Southern Oscillation and  
its teleconnections, *Quarterly Journal of the Royal Meteorological Society*, p. qj.4655, <https://doi.org/10.1002/qj.4655>, 2024.
- Yeh, S. W., Kug, J. S., Dewitte, B., Kwon, M. H., Kirtman, B. P., and Jin, F. F.: El Niño in a changing climate, *Nature*, 461, 511–514,  
650 <https://doi.org/10.1038/nature08316>, publisher: Nature Publishing Group, 2009.
- Yeh, S.-W., Cai, W., Min, S.-K., McPhaden, M. J., Dommenges, D., Dewitte, B., Collins, M., Ashok, K., An, S.-I., Yim, B.-Y., and  
Kug, J.-S.: ENSO Atmospheric Teleconnections and Their Response to Greenhouse Gas Forcing, *Reviews of Geophysics*, 56, 185–206,  
<https://doi.org/10.1002/2017RG000568>, 2018.
- Yun, K.-S., Lee, J.-Y., Timmermann, A., Stein, K., Stuecker, M. F., Fyfe, J. C., and Chung, E.-S.: Increasing ENSO–rainfall variability due to  
655 changes in future tropical temperature–rainfall relationship, *Communications Earth & Environment*, 2, 43, <https://doi.org/10.1038/s43247-021-00108-8>, 2021.
- Zhang, K., Sun, Y., Zhang, Z., Stepanek, C., Feng, R., Hill, D., Lohmann, G., Dolan, A., Haywood, A., Abe-Ouchi, A., Otto-Bliesner, B.,  
Contoux, C., Chandan, D., Ramstein, G., Dowsett, H., Tindall, J., Baatsen, M., Tan, N., Peltier, W. R., Li, Q., Chan, W.-L., Wang, X., and  
Zhang, X.: Revisiting the physical processes controlling the tropical atmospheric circulation changes during the Mid-Piacenzian Warm  
660 Period, *Quaternary International*, p. S1040618224000016, <https://doi.org/10.1016/j.quaint.2024.01.001>, 2024.
- Zhao, Y., Newman, M., Capotondi, A., Di Lorenzo, E., and Sun, D.: Removing the Effects of Tropical Dynamics from North Pacific Climate  
Variability, *Journal of Climate*, pp. 1–49, <https://doi.org/10.1175/JCLI-D-21-0344.1>, 2021.
- Zheng, J., Zhang, Q., Li, Q., Zhang, Q., and Cai, M.: Contribution of sea ice albedo and insulation effects to Arctic amplification in the  
EC-Earth Pliocene simulation, *Climate of the Past*, 15, 291–305, <https://doi.org/10.5194/cp-15-291-2019>, 2019.
- 665 Zheng, Y., Rugenstein, M., Pieper, P., Beobide-Arsuaga, G., and Baehr, J.: El Niño–Southern Oscillation (ENSO) predictability in equilibrated  
warmer climates, *Earth System Dynamics*, 13, 1611–1623, <https://doi.org/10.5194/esd-13-1611-2022>, 2022.
